# Supplementary material for: Evaluation of 19,460 Wheat Accessions Conserved in the Indian National Genebank to Identify New Sources of Resistance to Rust and Spot Blotch Diseases
Source: PubMed Central journal article supplement (PMC5153299; doi:10.1371/journal.pone.0167702), 2016-12-12
Supplement: pone.0167702.s001.pdf [file pone.0167702.s001.pdf]

**S1 Table. Avirulence/Virulence formula for mixture pathotypes of *Puccinia graminis* f.sp.*tritici*, *P. triticina*, and *P. striiformis*.**

| #                                                       | Pathotypes     | Avirulence                                                                                                                                      | Virulence                                                                                                                                                                               |
|---------------------------------------------------------|----------------|-------------------------------------------------------------------------------------------------------------------------------------------------|-----------------------------------------------------------------------------------------------------------------------------------------------------------------------------------------|
| <b>Stem rust: <i>P.graminis</i> f.sp.<i>tritici</i></b> |                |                                                                                                                                                 |                                                                                                                                                                                         |
| 1                                                       | 11(79G31)      | <i>Sr7a, Sr8a, Sr8b, Sr9e, Sr22, Sr23, Sr24, Sr25, Sr26, Sr27, Sr31, Sr32, Sr33, Sr35, Sr37, Sr39, Sr40, Sr43, SrTmp, SrTt3</i>                 | <i>Sr2, Sr5, Sr6, Sr7bSr9a, Sr9b, Sr9c, Sr9d, Sr9f, Sr9g, Sr10, Sr13, Sr14, Sr15, Sr16, Sr17, Sr18, Sr19, Sr20, Sr21, Sr28, Sr29, Sr30, Sr34, Sr36, Sr38, SrMcN</i>                     |
| 2                                                       | 40A(62G29)     | <i>Sr7a, Sr13, Sr21, Sr22, Sr24, Sr25, Sr26, Sr27, Sr30, Sr31, Sr32, Sr33, Sr35, Sr36, Sr37, Sr39, Sr40, Sr43, SrTmp, SrTt3</i>                 | <i>Sr2, Sr5, Sr6, Sr7b, Sr8a, Sr8b, Sr9a, Sr9b, Sr9d, Sr9e, Sr9f, Sr9g, Sr10, Sr14, Sr15, Sr16, Sr17, Sr18, Sr19, Sr20, Sr23, Sr28, Sr29, Sr34, SrMcN</i>                               |
| 3                                                       | 40-1(62G29-1)  | <i>Sr7a, Sr13, Sr21, Sr22, Sr25, Sr26, Sr27, Sr30, Sr31, Sr32, Sr33, Sr35, Sr36, Sr37, Sr39, Sr40, Sr43, SrTmp, SrTt3</i>                       | <i>Sr2, Sr5, Sr6, Sr7b, Sr8a, Sr8b, Sr9a, Sr9b, Sr9d, Sr9e, Sr9f, Sr9g, Sr10, Sr14, Sr15, Sr16, Sr17, Sr18, Sr19, Sr20, Sr23, Sr24, Sr28, Sr29, Sr34, SrMcN</i>                         |
| 4                                                       | 117-3(167G3)   | <i>Sr5, Sr8a, Sr8b, Sr9b, Sr22, Sr24, Sr25, Sr26, Sr27, Sr28, Sr30, Sr31, Sr32, Sr33, Sr35, Sr36, Sr38, Sr39, Sr40, Sr43, SrTmp</i>             | <i>Sr2, Sr6, Sr7a, Sr7b, Sr9e, Sr9f, Sr9g, Sr10, Sr11, Sr12, Sr13, Sr14, Sr15, Sr16, Sr17, Sr19, Sr21, Sr23, Sr29, Sr34, Sr37, SrMcN</i>                                                |
| <b>Leaf rust: <i>Puccinia triticina</i></b>             |                |                                                                                                                                                 |                                                                                                                                                                                         |
| 1                                                       | 17(61R24)      | <i>Lr1, Lr2a, Lr2b, Lr2c, Lr3, Lr10, Lr9, Lr19, Lr23, Lr24, Lr25, Lr26, Lr27+31, Lr28, Lr29, Lr30, Lr32, Lr36, Lr39, Lr41, Lr42, Lr43, Lr45</i> | <i>Lr11, Lr12, Lr13, Lr14a, Lr14b, Lr14ab, Lr15, Lr16, Lr17, Lr18, Lr20, Lr21, Lr22a, Lr22b, Lr30, Lr33, Lr34, Lr35, Lr37, Lr38, Lr44, Lr46, Lr48, Lr49</i>                             |
| 2                                                       | 77A(109R31)    | <i>Lr9, Lr17, Lr19, Lr24, Lr25, Lr26, Lr27+31, Lr28, Lr29, Lr32, Lr36, Lr39, Lr41, Lr42, Lr43, Lr45</i>                                         | <i>Lr1, Lr2a, Lr2b, Lr2c, Lr3, Lr10, Lr11, Lr12, Lr13, Lr14a, Lr14b, Lr14ab, Lr15, Lr16, Lr18, Lr20, Lr21, Lr22a, Lr22b, Lr23, Lr30, Lr33, Lr35, Lr37, Lr38, Lr44, Lr46, Lr48, Lr49</i> |
| 3                                                       | 77-5(121R63-1) | <i>Lr9, Lr18*, Lr19, Lr24, Lr25, Lr28, Lr29, Lr32, Lr40, Lr41, Lr42, Lr45</i>                                                                   | <i>Lr1, Lr2a, Lr2b, Lr2c, Lr3, Lr10, Lr11, Lr12, Lr13, Lr14a, Lr14b, Lr14ab, Lr15, Lr16, 17a, 20, 21, 22a, 22b, 23, 26, 27+31, 30, 33, 34, 35, 36, 37, 38, 43, 44, Lr46, 48, 49</i>     |

| #                                         | Pathotypes    | Avirulence                                                                                                                                                                                                                                   | Virulence                                                                                                                                                                                                                                                                                                                                                                                                                                                                                                        |
|-------------------------------------------|---------------|----------------------------------------------------------------------------------------------------------------------------------------------------------------------------------------------------------------------------------------------|------------------------------------------------------------------------------------------------------------------------------------------------------------------------------------------------------------------------------------------------------------------------------------------------------------------------------------------------------------------------------------------------------------------------------------------------------------------------------------------------------------------|
| 4                                         | 77-7(121R127) | <i>Lr18*</i> , <i>Lr19</i> , <i>Lr24</i> , <i>Lr25</i> , <i>Lr28</i> , <i>Lr29</i> , <i>Lr32</i> , <i>Lr40</i> , <i>Lr41</i> , <i>Lr42</i> , <i>Lr45</i>                                                                                     | <i>Lr1</i> , <i>Lr2a</i> , <i>Lr2b</i> , <i>Lr2c</i> , <i>Lr3</i> , <i>Lr9</i> , <i>Lr10</i> , <i>Lr11</i> , <i>Lr12</i> , <i>Lr13</i> , <i>Lr14a</i> , <i>Lr14b</i> , <i>Lr14ab</i> , <i>Lr15</i> , <i>Lr16</i> , <i>Lr17a</i> , <i>Lr20</i> , <i>Lr21</i> , <i>Lr22a</i> , <i>Lr22b</i> , <i>Lr23</i> , <i>Lr26</i> , <i>Lr27+31</i> , <i>Lr30</i> , <i>Lr33</i> , <i>Lr34</i> , <i>Lr35</i> , <i>Lr36</i> , <i>Lr37</i> , <i>Lr38</i> , <i>Lr43</i> , <i>Lr44</i> , <i>LrLr46</i> , <i>Lr48</i> , <i>Lr49</i> |
| 5                                         | 77-8(253R31)  | <i>Lr9</i> , <i>Lr23</i> , <i>Lr24</i> , <i>Lr25</i> , <i>Lr26</i> , <i>Lr27+31</i> , <i>Lr28</i> , <i>Lr29</i> , <i>Lr32</i> , <i>Lr36</i> , <i>Lr39</i> , <i>Lr45</i>                                                                      | <i>Lr1</i> , <i>Lr2a</i> , <i>Lr2b</i> , <i>Lr2c</i> , <i>Lr3a</i> , <i>Lr10</i> , <i>Lr11</i> , <i>Lr13</i> , <i>Lr14a</i> , <i>Lr14b</i> , <i>Lr14ab</i> , <i>Lr15</i> , <i>Lr16</i> , <i>Lr17</i> , <i>Lr18</i> , <i>Lr19</i> , <i>Lr20</i> , <i>Lr21</i> , <i>Lr22a</i> , <i>Lr22b</i> , <i>LrLr30</i> , <i>Lr33</i> , <i>Lr35</i> , <i>Lr37</i> , <i>Lr38</i> , <i>Lr44</i> , <i>Lr46</i> , <i>Lr48</i> , <i>Lr49</i>                                                                                       |
| 6                                         | 104-2(21R55)  | <i>Lr9</i> , <i>Lr10*</i> , <i>Lr13*</i> , <i>Lr15</i> , <i>Lr19</i> , <i>Lr20</i> , <i>Lr24</i> , <i>Lr25</i> , <i>Lr28</i> , <i>Lr29</i> , <i>Lr32</i> , <i>Lr36</i> , <i>Lr40</i> , <i>Lr41</i> , <i>Lr42</i> , <i>Lr43</i> , <i>Lr45</i> | <i>Lr1</i> , <i>Lr2a*</i> , <i>Lr2b</i> , <i>Lr2c</i> , <i>Lr3</i> , <i>Lr11</i> , <i>Lr12</i> , <i>Lr14a</i> , <i>Lr14b</i> , <i>Lr14ab</i> , <i>Lr16</i> , <i>Lr17a</i> , <i>Lr18</i> , <i>Lr21</i> , <i>Lr22a</i> , <i>Lr22b</i> , <i>Lr23</i> , <i>Lr26</i> , <i>Lr27+31</i> , <i>Lr30</i> , <i>Lr33</i> , <i>Lr34</i> , <i>Lr35</i> , <i>Lr37</i> , <i>Lr38</i> , <i>LrLr44</i> , <i>Lr46</i> , <i>Lr48</i> , <i>Lr49</i> ,                                                                                 |
| <b>Stripe rust: <i>P. striiformis</i></b> |               |                                                                                                                                                                                                                                              |                                                                                                                                                                                                                                                                                                                                                                                                                                                                                                                  |
| 1                                         | 78S84         | <i>Yr1</i> , <i>Yr4</i> , <i>Yr5</i> , <i>Yr10</i> , <i>Yr11</i> , <i>Yr12</i> , <i>Yr13</i> , <i>Yr14</i> , <i>Yr15</i> , <i>Yr16</i> , <i>Yr24</i> , <i>Yr26</i> , <i>Yrsk</i> , <i>YrA</i>                                                | <i>Yr2</i> , <i>Yr6</i> , <i>Yr7</i> , <i>Yr8</i> , <i>Yr9</i> , <i>Yr17</i> , <i>Yr18</i> , <i>Yr19</i> , <i>Yr21</i> , <i>Yr22</i> , <i>Yr23</i> , <i>Yr25</i> , <i>Yr27</i>                                                                                                                                                                                                                                                                                                                                   |
| 2                                         | 46S119        | <i>Yr1</i> , <i>Yr5</i> , <i>Yr10</i> , <i>Yr11</i> , <i>Yr12</i> , <i>Yr13</i> , <i>Yr14</i> , <i>Yr15</i> , <i>Yr16</i> , <i>Yr24</i> , <i>Yr26</i> , <i>Yrsp</i> , <i>Yrsk</i>                                                            | <i>Yr2</i> , <i>Yr3</i> , <i>Yr4</i> , <i>Yr6</i> , <i>Yr7</i> , <i>Yr8</i> , <i>Yr9</i> , <i>Yr17</i> , <i>Yr18</i> , <i>Yr19</i> , <i>Yr21</i> , <i>Yr22</i> , <i>Yr23</i> , <i>Yr25</i> , <i>YrA</i>                                                                                                                                                                                                                                                                                                          |
| 3                                         | I(38S102)     | <i>Yr1</i> , <i>Yr3</i> , <i>Yr5</i> , <i>Yr9</i> , <i>Yr10</i> , <i>Yr11</i> , <i>Yr12</i> , <i>Yr13</i> , <i>Yr14</i> , <i>Yr15</i> , <i>Yr16</i> , <i>Yr24</i> , <i>Yr26</i> , <i>Yrsp</i> , <i>Yrsk</i>                                  | <i>Yr2</i> , <i>Yr4</i> , <i>Yr6</i> , <i>Yr7</i> , <i>Yr8</i> , <i>Yr17</i> , <i>Yr18</i> , <i>Yr19</i> , <i>Yr21</i> , <i>Yr22</i> , <i>Yr23</i> , <i>Yr25</i> , <i>YrA</i>                                                                                                                                                                                                                                                                                                                                    |

**Formula: Avirulence=R and MR type of reaction, Virulence=S and MS type of reaction.**
