# Supplementary material for: Evaluation of 19,460 Wheat Accessions Conserved in the Indian National Genebank to Identify New Sources of Resistance to Rust and Spot Blotch Diseases
Source: PubMed Central journal article supplement (PMC5153299; doi:10.1371/journal.pone.0167702), 2016-12-12
Supplement: pone.0167702.s002.pdf [file pone.0167702.s002.pdf]

**S2 Table. A list of 56 wheat accessions found to possess multiple disease resistance to rusts and spot blotch.** Disease scores were determined by taking into account the severity of disease (R – resistant and MR – moderately resistant) at three disease hotspots (Wellington, Gurdaspur and Cooch Behar). Additional information on source and year of acquisition are given as available in genebank databases. The seedling resistance was recorded as resistant either to only one rust disease leaf/brown (R), stem/black (B) or stripe/yellow (Y) or a combination of two or all the three rust diseases; 'O' indicates susceptible to all rusts and N means no data. Additional information on source and year of acquisition are given as available. NA: absence of verified information. Accessions shown as sourced from Mexico mainly include those from CIMMYT.

| #  | Genebank_ID  | Species           | Stripe rust Gurdaspur | Spot blotch Cooch Behar | Stripe rust Wellington | Stem rust Wellington | Leaf rust Wellington | YEAR | Source | Seedling Resistance | Resistance genotype (based on marker assay)          |
|----|--------------|-------------------|-----------------------|-------------------------|------------------------|----------------------|----------------------|------|--------|---------------------|------------------------------------------------------|
| 1  | EC11159      | <i>T.aestivum</i> | R                     | MR                      | R                      | R                    | R                    | 1956 | USA    | O                   | NA                                                   |
| 2  | EC178071-282 | <i>T.aestivum</i> | R                     | MR                      | R                      | R                    | R                    | NA   | NA     | Y                   | Lr19Lr22aLr32Lr46Lr50Lr67Lr68Yr5Yr15Yr36Yr48Sr13Sr24 |
| 3  | EC178071-339 | <i>T.aestivum</i> | R                     | MR                      | R                      | R                    | R                    | NA   | NA     | Y                   | Lr19Lr22aLr46Lr50Lr67Lr68Yr5Yr15Yr36Yr48Sr24         |
| 4  | EC276646     | <i>T.durum</i>    | R                     | R                       | R                      | R                    | R                    | 1988 | MEXICO | O                   | NA                                                   |
| 5  | EC276740     | <i>T.durum</i>    | R                     | MR                      | R                      | R                    | R                    | 1988 | MEXICO | NA                  | NA                                                   |
| 6  | EC276771     | <i>T.durum</i>    | R                     | MR                      | R                      | R                    | R                    | 1988 | MEXICO | O                   | NA                                                   |
| 7  | EC277088     | <i>T.aestivum</i> | R                     | MR                      | R                      | R                    | R                    | 1988 | MEXICO | R                   | NA                                                   |
| 8  | EC277098     | <i>T.aestivum</i> | R                     | MR                      | R                      | R                    | R                    | 1988 | MEXICO | R                   | NA                                                   |
| 9  | EC277119     | <i>T.durum</i>    | R                     | MR                      | R                      | R                    | R                    | 1988 | MEXICO | R                   | NA                                                   |
| 10 | EC277189     | <i>T.durum</i>    | R                     | MR                      | R                      | R                    | R                    | 1988 | MEXICO | R                   | NA                                                   |
| 11 | EC277211     | <i>T.durum</i>    | R                     | MR                      | R                      | R                    | R                    | 1988 | MEXICO | BR                  | Lr19Lr22aLr32Lr46Yr5Yr15Yr36Yr48Sr13Sr2              |
| 12 | EC299242     | <i>T.durum</i>    | R                     | MR                      | R                      | R                    | R                    | 1989 | SYRIA  | O                   | NA                                                   |
| 13 | EC299270     | <i>T.durum</i>    | R                     | MR                      | R                      | R                    | R                    | 1989 | SYRIA  | Y                   | Lr22aLr46Lr50Lr67Yr15Yr48Sr13Sr2Sr24                 |
| 14 | EC339599     | <i>T.aestivum</i> | R                     | MR                      | R                      | R                    | R                    | 1992 | USA    | B                   | NA                                                   |
| 15 | EC339604     | <i>T.aestivum</i> | R                     | MR                      | R                      | R                    | R                    | 1992 | USA    | Y                   | Lr22aLr46Lr67Yr5Yr15Yr48Sr13                         |
| 16 | EC339606     | <i>T.aestivum</i> | R                     | MR                      | R                      | R                    | R                    | 1992 | USA    | O                   | NA                                                   |
| 17 | EC339612     | <i>T.aestivum</i> | R                     | R                       | R                      | R                    | R                    | 1992 | USA    | O                   | NA                                                   |
| 18 | EC444889     | <i>T.durum</i>    | R                     | MR                      | R                      | R                    | R                    | 1999 | MEXICO | R                   | NA                                                   |
| 19 | EC445197     | <i>T.durum</i>    | R                     | MR                      | R                      | R                    | R                    | 1999 | MEXICO | B                   | NA                                                   |
| 20 | EC445290     | <i>T.durum</i>    | R                     | MR                      | R                      | R                    | R                    | 1999 | MEXICO | R                   | NA                                                   |
| 21 | EC445357     | <i>T.durum</i>    | R                     | MR                      | R                      | R                    | R                    | 1999 | MEXICO | BR                  | NA                                                   |
| 22 | EC574430     | <i>T.aestivum</i> | R                     | MR                      | R                      | R                    | R                    | 2006 | NA     | O                   | NA                                                   |
| 23 | EC574831     | <i>T.aestivum</i> | R                     | MR                      | R                      | R                    | R                    | 2006 | NA     | O                   | NA                                                   |
| 24 | EC576062     | <i>T.aestivum</i> | R                     | MR                      | R                      | R                    | R                    | 2006 | NA     | YB                  | Lr19Lr22aLr46Lr50Yr5Yr48Sr13Sr24                     |
| 25 | EC577531     | <i>T.durum</i>    | R                     | R                       | R                      | R                    | R                    | 2006 | NA     | O                   | NA                                                   |
| 26 | EC578070     | <i>T.aestivum</i> | R                     | MR                      | R                      | R                    | R                    | 2006 | NA     | Y                   | Lr46Lr50Lr67Yr15Yr48Sr2                              |
| 27 | EC578084     | <i>T.aestivum</i> | R                     | R                       | R                      | R                    | R                    | 2006 | NA     | Y                   | Lr22aLr46Lr67Yr15Yr48Sr13Sr2                         |
| 28 | EC578103     | <i>T.aestivum</i> | R                     | R                       | R                      | R                    | R                    | 2006 | NA     | YB                  | Lr19Lr22aLr46Lr50Lr67Yr15Yr48Sr13                    |
| 29 | EC582263     | <i>T.aestivum</i> | R                     | MR                      | R                      | R                    | R                    | 2006 | USA    | YB                  | Lr22aLr32Lr46Lr50Lr67Lr68Yr15Yr36Yr48Sr13Sr2Sr24     |
| 30 | EC582265     | <i>T.aestivum</i> | R                     | MR                      | R                      | R                    | R                    | 2006 | USA    | N                   | NA                                                   |
| 31 | EC592964     | <i>T.durum</i>    | R                     | MR                      | R                      | R                    | R                    | 2006 | MEXICO | BR                  | NA                                                   |
| 32 | EC592966     | <i>T.durum</i>    | R                     | MR                      | R                      | R                    | R                    | 2006 | MEXICO | R                   | NA                                                   |
| 33 | IC401998     | <i>T.aestivum</i> | R                     | MR                      | R                      | R                    | R                    | 2004 | India  | N                   | NA                                                   |
| 34 | IC402025     | <i>T.aestivum</i> | R                     | MR                      | R                      | R                    | R                    | NA   | NA     | N                   | NA                                                   |
| 35 | IC415859     | <i>T.aestivum</i> | R                     | MR                      | R                      | R                    | R                    | 2003 | India  | R                   | NA                                                   |
| 36 | IC416364     | <i>T.durum</i>    | R                     | MR                      | R                      | R                    | R                    | 2003 | NA     | BR                  | Lr19Lr22aLr46Lr50Lr68Sr2                             |
| 37 | IC49752      | <i>T.aestivum</i> | R                     | MR                      | R                      | R                    | R                    | NA   | NA     | N                   | NA                                                   |
| 38 | IC528922     | <i>T.aestivum</i> | R                     | MR                      | R                      | R                    | R                    | 2005 | India  | N                   | NA                                                   |
| 39 | IC528923     | <i>T.aestivum</i> | R                     | MR                      | R                      | R                    | R                    | 2005 | India  | O                   | NA                                                   |
| 40 | IC528997     | <i>T.aestivum</i> | R                     | R                       | R                      | R                    | R                    | 2005 | India  | N                   | NA                                                   |
| 41 | IC529017     | <i>T.aestivum</i> | R                     | MR                      | R                      | R                    | R                    | 2005 | India  | N                   | NA                                                   |

|    |          |                   |   |    |   |   |   |      |       |     |                              |
|----|----------|-------------------|---|----|---|---|---|------|-------|-----|------------------------------|
| 42 | IC529030 | <i>T.aestivum</i> | R | MR | R | R | R | 2005 | India | N   | NA                           |
| 43 | IC529035 | <i>T.aestivum</i> | R | MR | R | R | R | 2005 | India | N   | NA                           |
| 44 | IC529036 | <i>T.aestivum</i> | R | MR | R | R | R | 2005 | India | N   | NA                           |
| 45 | IC529311 | <i>T.aestivum</i> | R | R  | R | R | R | 2005 | India | N   | NA                           |
| 46 | IC529353 | <i>T.aestivum</i> | R | R  | R | R | R | 2005 | India | N   | NA                           |
| 47 | IC529644 | <i>T.aestivum</i> | R | MR | R | R | R | 2005 | India | N   | NA                           |
| 48 | IC535001 | <i>T.aestivum</i> | R | MR | R | R | R | NA   | NA    | N   | NA                           |
| 49 | IC535119 | <i>T.dicoccum</i> | R | MR | R | R | R | NA   | NA    | N   | NA                           |
| 50 | IC539173 | <i>T.aestivum</i> | R | MR | R | R | R | 2005 | India | YBR | Lr19Lr22aLr46Lr68Yr48Sr13    |
| 51 | IC542125 | <i>T.durum</i>    | R | MR | R | R | R | NA   | India | B   | NA                           |
| 52 | IC542818 | <i>T.durum</i>    | R | MR | R | R | R | NA   | NA    | R   | NA                           |
| 53 | IC543020 | <i>T.durum</i>    | R | MR | R | R | R | NA   | NA    | O   | NA                           |
| 54 | IC543116 | <i>T.durum</i>    | R | MR | R | R | R | NA   | NA    | Y   | Lr22aLr46Yr5Yr15Yr48Sr13Sr2  |
| 55 | IC543233 | <i>T.durum</i>    | R | R  | R | R | R | NA   | NA    | Y   | Lr22aLr46Yr15Yr36Yr48Sr13Sr2 |
| 56 | IC543360 | <i>T.aestivum</i> | R | MR | R | R | R | NA   | NA    | N   | NA                           |
