# Supplementary material for: Evaluation of 19,460 Wheat Accessions Conserved in the Indian National Genebank to Identify New Sources of Resistance to Rust and Spot Blotch Diseases
Source: PubMed Central journal article supplement (PMC5153299; doi:10.1371/journal.pone.0167702), 2016-12-12
Supplement: pone.0167702.s003.pdf [file pone.0167702.s003.pdf]

**S3 Table. Accession-wise details of 659 wheat accessions that were subjected to seedling resistance screening.** Seedling resistance screening was carried out under controlled condition at the Regional Station of Indian Institute of Wheat and Barley Research (IIWBR), Flowerdale, Shimla. Field level disease scores were determined by taking into account the severity of disease on plant leaves denoted by per cent area covered and converted to host response (R – resistant and MR – moderately resistant) at three disease hotspots (Wellington, Gurdaspur and Cooch Behar). The seedling resistance was recorded as resistant either to only one rust disease leaf/brown (R), stem/black (B) or stripe/yellow (Y) or a combination of two or all the three rust diseases; 'O' indicates susceptible to all rusts and N means no data. Additional information on source and year of acquisition are given as available. NA: absence of verified information. Accessions 1 to 639 were short-listed after primary evaluation at Wellington (found resistant to all three rusts); accessions 640 to 654 were not short-listed after primary evaluation at Wellington (used as susceptible checks); accessions 655 to 659 were genetic stocks not included in primary evaluation. Accessions shown as sourced from Mexico mainly include those from CIMMYT.

| #  | Seedling Resistance | Genebank_ID     | Species           | Stripe rust Gurdaspur | Spot blotch Cooch Behar | Stripe rust Wellington | Stem rust Wellington | Leaf rust Wellington | Year | Source | Resistace genotype (based on marker assay)   |
|----|---------------------|-----------------|-------------------|-----------------------|-------------------------|------------------------|----------------------|----------------------|------|--------|----------------------------------------------|
| 1  | YR                  | IC543302        | <i>T.durum</i>    | MS                    | S                       | R                      | R                    | R                    | NA   | INDIA  | NA                                           |
| 2  | YR                  | IC543112        | <i>T.durum</i>    | R                     | S                       | R                      | R                    | R                    | NA   | INDIA  | NA                                           |
| 3  | YR                  | IC543036        | <i>T.durum</i>    | R                     | S                       | R                      | R                    | R                    | NA   | INDIA  | NA                                           |
| 4  | YR                  | IC536015        | <i>T.durum</i>    | R                     | S                       | R                      | R                    | R                    | NA   | INDIA  | NA                                           |
| 5  | YR                  | EC534557        | <i>T.aestivum</i> | R                     | MS                      | R                      | R                    | R                    | 2003 | USA    | NA                                           |
| 6  | YR                  | EC276861        | <i>T.durum</i>    | R                     | S                       | R                      | R                    | R                    | 1988 | MEXICO | Lr22aLr32Lr46Lr50Yr15Yr36Yr48Sr13            |
| 7  | YR                  | EC276847        | <i>T.durum</i>    | R                     | S                       | R                      | R                    | R                    | 1988 | MEXICO | Lr19Lr22aLr37Lr46Lr50Yr15Yr48Sr13            |
| 8  | YR                  | EC276759        | <i>T.durum</i>    | R                     | MS                      | R                      | R                    | R                    | 1988 | MEXICO | Lr22aLr46Lr50Yr5Yr15Yr48Sr2Sr13              |
| 9  | YBR                 | IC539173        | <i>T.aestivum</i> | R                     | MR                      | R                      | R                    | R                    | 2005 | INDIA  | NA                                           |
| 10 | YBR                 | IC266733        | <i>T.aestivum</i> | R                     | MS                      | R                      | R                    | R                    | 2000 | INDIA  | Lr19Lr22aLr46Lr50Lr68Yr36Yr48                |
| 11 | YBR                 | EC574756        | <i>T.aestivum</i> | R                     | S                       | R                      | R                    | R                    | 2006 | NA     | Lr19Lr34Lr46Lr50Yr5Yr15Sr2Sr13               |
| 12 | YBR                 | EC445442        | <i>T.durum</i>    | R                     | S                       | R                      | R                    | R                    | 1999 | MEXICO | Lr19Lr22aLr46Lr50Yr5Yr36Yr48Sr2Sr13          |
| 13 | YBR                 | EC178071-693    | <i>T.aestivum</i> | R                     | MS                      | R                      | R                    | R                    | NA   | NA     | Lr19Lr22aLr32Lr37Lr46Lr50Yr48                |
| 14 | YB                  | IC542830        | <i>T.durum</i>    | R                     | S                       | R                      | R                    | R                    | NA   | INDIA  | NA                                           |
| 15 | YB                  | IC542625        | <i>T.durum</i>    | >20S                  | MS                      | R                      | R                    | R                    | NA   | INDIA  | NA                                           |
| 16 | YB                  | IC542594        | <i>T.durum</i>    | R                     | MS                      | R                      | R                    | R                    | NA   | INDIA  | NA                                           |
| 17 | YB                  | IC535852        | <i>T.durum</i>    | R                     | MS                      | R                      | R                    | R                    | NA   | INDIA  | NA                                           |
| 18 | YB                  | IC470825-FLW-11 | <i>T.aestivum</i> | <20S                  | MS                      | R                      | R                    | R                    | 2005 | INDIA  | NA                                           |
| 19 | YB                  | IC416088        | <i>T.aestivum</i> | R                     | MS                      | R                      | R                    | R                    | 2003 | INDIA  | Lr19Lr22aLr32Lr46Yr5Yr15Yr48Sr2Sr13          |
| 20 | YB                  | IC416035        | <i>T.aestivum</i> | R                     | MS                      | R                      | R                    | R                    | 2003 | INDIA  | Lr19Lr22aLr46Lr50Yr5Yr15Yr36Yr48Sr2Sr13      |
| 21 | YB                  | IC252459        | <i>T.aestivum</i> | R                     | S                       | R                      | R                    | R                    | 1999 | INDIA  | Lr22aLr32Lr37Lr46Lr50Yr5Yr15Yr36Yr48Sr2Sr13  |
| 22 | YB                  | EC582263        | <i>T.aestivum</i> | R                     | MR                      | R                      | R                    | R                    | 2006 | USA    | NA                                           |
| 23 | YB                  | EC578103        | <i>T.aestivum</i> | R                     | R                       | R                      | R                    | R                    | 2006 | NA     | Lr19Lr22aLr37Lr46Lr50Lr67Yr15Yr48Sr13        |
| 24 | YB                  | EC578064        | <i>T.aestivum</i> | R                     | MS                      | R                      | R                    | R                    | 2006 | NA     | Lr22aLr32Lr37Lr46Yr15Yr48Sr13                |
| 25 | YB                  | EC577422        | <i>T.durum</i>    | MS                    | S                       | R                      | R                    | R                    | 2006 | NA     | Lr19Lr22aLr46Lr50Lr67Yr15Yr36Yr48Sr13        |
| 26 | YB                  | EC576062        | <i>T.aestivum</i> | R                     | MR                      | R                      | R                    | R                    | 2006 | NA     | Lr19Lr22aLr34Lr46Lr50Yr5Yr48Sr13Sr24         |
| 27 | YB                  | EC574879        | <i>T.aestivum</i> | R                     | MS                      | R                      | R                    | R                    | 2006 | NA     | Lr22aLr34Lr37Lr46Yr5Yr15Yr36Yr48             |
| 28 | YB                  | EC178071-195    | <i>T.aestivum</i> | R                     | S                       | R                      | R                    | R                    | NA   | NA     | Lr19Lr22aLr34Lr37Lr46Lr50Yr36Yr48Sr2Sr13Sr24 |
| 29 | YB                  | EC178071-194    | <i>T.aestivum</i> | R                     | MS                      | R                      | R                    | R                    | NA   | NA     | Lr19Lr22aLr46Lr50Yr48Sr2Sr13Sr24             |
| 30 | YB                  | EC178071-193    | <i>T.aestivum</i> | R                     | MS                      | R                      | R                    | R                    | NA   | NA     | Lr19Lr22aLr34Lr37Lr46Lr50Yr48Sr13Sr24        |
| 31 | YB                  | EC178071-169    | <i>T.aestivum</i> | R                     | MS                      | R                      | R                    | R                    | NA   | NA     | Lr22aLr46Yr48Sr24                            |
| 32 | Y                   | IC75240         | <i>T.aestivum</i> | R                     | S                       | R                      | R                    | R                    | 2004 | INDIA  | NA                                           |
| 33 | Y                   | IC543275(2311)  | <i>T.durum</i>    | R                     | S                       | R                      | R                    | R                    | NA   | INDIA  | NA                                           |
| 34 | Y                   | IC543233        | <i>T.durum</i>    | R                     | R                       | R                      | R                    | R                    | NA   | INDIA  | NA                                           |
| 35 | Y                   | IC543143        | <i>T.durum</i>    | R                     | MS                      | R                      | R                    | R                    | NA   | INDIA  | NA                                           |
| 36 | Y                   | IC543116        | <i>T.durum</i>    | R                     | MR                      | R                      | R                    | R                    | NA   | INDIA  | NA                                           |
| 37 | Y                   | IC542919        | <i>T.durum</i>    | R                     | S                       | R                      | R                    | R                    | NA   | INDIA  | NA                                           |
| 38 | Y                   | IC542857        | <i>T.durum</i>    | MS                    | MS                      | R                      | R                    | R                    | NA   | INDIA  | NA                                           |

|    |   |                 |                   |      |      |   |   |   |      |        |                                                                  |
|----|---|-----------------|-------------------|------|------|---|---|---|------|--------|------------------------------------------------------------------|
| 39 | Y | IC542843        | <i>T.durum</i>    | R    | S    | R | R | R | NA   | INDIA  | <i>NA</i>                                                        |
| 40 | Y | IC542805        | <i>T.durum</i>    | R    | S    | R | R | R | NA   | INDIA  | <i>NA</i>                                                        |
| 41 | Y | IC542770        | <i>T.durum</i>    | R    | S    | R | R | R | NA   | INDIA  | <i>NA</i>                                                        |
| 42 | Y | IC542757        | <i>T.durum</i>    | MS   | S    | R | R | R | NA   | INDIA  | <i>NA</i>                                                        |
| 43 | Y | IC542746        | <i>T.durum</i>    | MS   | MS   | R | R | R | NA   | INDIA  | <i>NA</i>                                                        |
| 44 | Y | IC542744        | <i>T.durum</i>    | MS   | MR   | R | R | R | NA   | INDIA  | <i>NA</i>                                                        |
| 45 | Y | IC542729        | <i>T.durum</i>    | MS   | MS   | R | R | R | NA   | INDIA  | <i>NA</i>                                                        |
| 46 | Y | IC542614        | <i>T.durum</i>    | R    | MS   | R | R | R | NA   | INDIA  | <i>NA</i>                                                        |
| 47 | Y | IC539166        | <i>T.aestivum</i> | R    | MS   | R | R | R | 2005 | INDIA  | <i>NA</i>                                                        |
| 48 | Y | IC536366        | <i>T.durum</i>    | R    | MS   | R | R | R | NA   | INDIA  | <i>NA</i>                                                        |
| 49 | Y | IC536365        | <i>T.durum</i>    | R    | MS   | R | R | R | NA   | INDIA  | <i>NA</i>                                                        |
| 50 | Y | IC536019        | <i>T.durum</i>    | R    | S    | R | R | R | NA   | INDIA  | <i>NA</i>                                                        |
| 51 | Y | IC535860        | <i>T.durum</i>    | R    | S    | R | R | R | NA   | INDIA  | <i>NA</i>                                                        |
| 52 | Y | IC535858        | <i>T.durum</i>    | R    | S    | R | R | R | NA   | INDIA  | <i>NA</i>                                                        |
| 53 | Y | IC535851        | <i>T.durum</i>    | R    | MS   | R | R | R | NA   | INDIA  | <i>NA</i>                                                        |
| 54 | Y | IC533716        | <i>T.aestivum</i> | R    | MS   | R | R | R | NA   | INDIA  | <i>NA</i>                                                        |
| 55 | Y | IC470827-FLW-13 | <i>T.aestivum</i> | <20S | NULL | R | R | R | 2005 | INDIA  | <i>NA</i>                                                        |
| 56 | Y | IC469457        | <i>T.aestivum</i> | R    | MS   | R | R | R | 2005 | INDIA  | <i>NA</i>                                                        |
| 57 | Y | IC445510        | <i>T.aestivum</i> | R    | S    | R | R | R | 2004 | INDIA  | <i>NA</i>                                                        |
| 58 | Y | IC416380        | <i>T.durum</i>    | R    | S    | R | R | R | 2003 | INDIA  | <i>Lr19Lr22aLr34Lr37Lr46Lr50Yr15Yr36Yr48Sr13</i>                 |
| 59 | Y | IC393886        | <i>T.durum</i>    | R    | MS   | R | R | R | 2002 | INDIA  | <i>Lr19Lr22aLr34Lr37Lr46Lr50Yr15Yr36Yr48Sr24</i>                 |
| 60 | Y | IC335812(1968)  | <i>T.aestivum</i> | MS   | S    | R | R | R | 2002 | INDIA  | <i>Lr22aLr34Lr37Lr46Lr50Lr67Yr15Yr48Sr24</i>                     |
| 61 | Y | IC290150        | <i>T.aestivum</i> | R    | S    | R | R | R | NA   | INDIA  | <i>NA</i>                                                        |
| 62 | Y | IC252995        | <i>T.aestivum</i> | R    | MS   | R | R | R | 1999 | INDIA  | <i>Lr19Lr22aLr32Lr46Lr50Yr15Yr15Yr48Sr24</i>                     |
| 63 | Y | IC252413        | <i>T.aestivum</i> | R    | S    | R | R | R | 1999 | INDIA  | <i>Lr22aLr32Lr37Lr46Lr50Yr15Yr15Yr36Yr48</i>                     |
| 64 | Y | EC578084        | <i>T.aestivum</i> | R    | R    | R | R | R | 2006 | NA     | <i>Lr22aLr37Lr46Lr67Yr15Yr48Sr2Sr13</i>                          |
| 65 | Y | EC578070        | <i>T.aestivum</i> | R    | MR   | R | R | R | 2006 | NA     | <i>Lr46Lr50Lr67Yr15Yr48Sr2</i>                                   |
| 66 | Y | EC575211        | <i>T.aestivum</i> | R    | MS   | R | R | R | 2006 | NA     | <i>NA</i>                                                        |
| 67 | Y | EC574482        | <i>T.aestivum</i> | R    | S    | R | R | R | 2006 | NA     | <i>Lr22aLr46Lr50Lr67Lr68Yr15Yr15Yr48</i>                         |
| 68 | Y | EC574479        | <i>T.aestivum</i> | R    | MS   | R | R | R | 2006 | NA     | <i>Lr19Lr22aLr32Lr34Lr37Lr46Lr50Lr67Lr68Yr15Yr15Yr48Sr13Sr24</i> |
| 69 | Y | EC534558        | <i>T.aestivum</i> | R    | S    | R | R | R | 2003 | USA    | <i>NA</i>                                                        |
| 70 | Y | EC493712        | <i>T.aestivum</i> | MS   | S    | R | R | R | 2002 | USA    | <i>NA</i>                                                        |
| 71 | Y | EC339604        | <i>T.aestivum</i> | R    | MR   | R | R | R | 1992 | USA    | <i>Lr19Lr22aLr32Lr46Lr50Yr15Yr15Yr48Sr2</i>                      |
| 72 | Y | EC299270        | <i>T.durum</i>    | R    | MR   | R | R | R | 1989 | SYRIA  | <i>Lr22aLr34Lr46Lr50Lr67Yr15Yr48Sr2Sr13Sr24</i>                  |
| 73 | Y | EC277348        | <i>T.durum</i>    | R    | S    | R | R | R | 1988 | MEXICO | <i>Lr22aLr67Yr15Yr15Yr36Yr48Sr2Sr24</i>                          |
| 74 | Y | EC277339        | <i>T.durum</i>    | R    | S    | R | R | R | 1988 | MEXICO | <i>Lr19Lr22aLr32Lr37Lr46Lr50Yr15Yr15Yr36Yr48Sr13</i>             |
| 75 | Y | EC277113        | <i>T.durum</i>    | R    | MS   | R | R | R | 1988 | MEXICO | <i>Lr22aLr32Lr46Lr50Yr15Yr15Yr36Yr48Sr2</i>                      |
| 76 | Y | EC276979        | <i>T.durum</i>    | R    | S    | R | R | R | 1988 | MEXICO | <i>Lr19Lr22aLr34Lr46Yr15Yr48Sr2Sr13</i>                          |
| 77 | Y | EC276909(2428)  | <i>T.aestivum</i> | R    | MS   | R | R | R | 1988 | MEXICO | <i>NA</i>                                                        |
| 78 | Y | EC276803        | <i>T.durum</i>    | R    | MS   | R | R | R | 1988 | MEXICO | <i>Lr19Lr22aLr46Yr15Yr15Yr36Yr48</i>                             |
| 79 | Y | EC276732        | <i>T.durum</i>    | R    | S    | R | R | R | 1988 | MEXICO | <i>Lr19Lr22aLr46Lr50Yr15Yr15Yr36Yr48Sr2Sr13</i>                  |
| 80 | Y | EC276709        | <i>T.durum</i>    | R    | MS   | R | R | R | 1988 | MEXICO | <i>Lr22aLr34Lr37Lr46Lr50Yr15Yr15Yr48Sr2Sr13</i>                  |
| 81 | Y | EC178071-339    | <i>T.aestivum</i> | R    | MR   | R | R | R | NA   | NA     | <i>Lr19Lr22aLr46Lr50Lr67Lr68Yr15Yr15Yr36Yr48Sr24</i>             |
| 82 | Y | EC178071-282    | <i>T.aestivum</i> | R    | MR   | R | R | R | NA   | NA     | <i>Lr19Lr22aLr32Lr46Lr50Lr67Lr68Yr15Yr15Yr36Yr48Sr13Sr24</i>     |
| 83 | R | IC549347        | <i>T.aestivum</i> | R    | S    | R | R | R | 2006 | INDIA  | <i>NA</i>                                                        |
| 84 | R | IC547607        | <i>T.aestivum</i> | R    | S    | R | R | R | 2006 | INDIA  | <i>NA</i>                                                        |
| 85 | R | IC543410        | <i>T.aestivum</i> | R    | S    | R | R | R | NA   | INDIA  | <i>NA</i>                                                        |
| 86 | R | IC543255        | <i>T.durum</i>    | R    | MS   | R | R | R | NA   | INDIA  | <i>NA</i>                                                        |
| 87 | R | IC543121        | <i>T.durum</i>    | R    | S    | R | R | R | NA   | INDIA  | <i>NA</i>                                                        |
| 88 | R | IC543048        | <i>T.durum</i>    | R    | S    | R | R | R | NA   | INDIA  | <i>NA</i>                                                        |
| 89 | R | IC543040        | <i>T.durum</i>    | MS   | S    | R | R | R | NA   | INDIA  | <i>NA</i>                                                        |

|     |   |          |                   |      |    |   |   |   |      |       |                                         |
|-----|---|----------|-------------------|------|----|---|---|---|------|-------|-----------------------------------------|
| 90  | R | IC542938 | <i>T.durum</i>    | MS   | S  | R | R | R | NA   | INDIA | NA                                      |
| 91  | R | IC542853 | <i>T.durum</i>    | R    | S  | R | R | R | NA   | INDIA | NA                                      |
| 92  | R | IC542851 | <i>T.durum</i>    | MS   | S  | R | R | R | NA   | INDIA | NA                                      |
| 93  | R | IC542844 | <i>T.durum</i>    | R    | S  | R | R | R | NA   | INDIA | NA                                      |
| 94  | R | IC542834 | <i>T.durum</i>    | R    | S  | R | R | R | NA   | INDIA | NA                                      |
| 95  | R | IC542818 | <i>T.durum</i>    | R    | MR | R | R | R | NA   | INDIA | NA                                      |
| 96  | R | IC542760 | <i>T.durum</i>    | MS   | S  | R | R | R | NA   | INDIA | NA                                      |
| 97  | R | IC542753 | <i>T.durum</i>    | MS   | S  | R | R | R | NA   | INDIA | NA                                      |
| 98  | R | IC542714 | <i>T.durum</i>    | R    | S  | R | R | R | NA   | INDIA | NA                                      |
| 99  | R | IC542684 | <i>T.durum</i>    | MS   | S  | R | R | R | NA   | INDIA | NA                                      |
| 100 | R | IC542624 | <i>T.durum</i>    | R    | S  | R | R | R | NA   | INDIA | NA                                      |
| 101 | R | IC542120 | <i>T.durum</i>    | R    | MS | R | R | R | NA   | INDIA | NA                                      |
| 102 | R | IC542118 | <i>T.durum</i>    | R    | MS | R | R | R | NA   | INDIA | NA                                      |
| 103 | R | IC539484 | <i>T.aestivum</i> | R    | S  | R | R | R | 2005 | INDIA | NA                                      |
| 104 | R | IC539442 | <i>T.aestivum</i> | R    | MS | R | R | R | 2005 | INDIA | NA                                      |
| 105 | R | IC539136 | <i>T.aestivum</i> | R    | MS | R | R | R | 2005 | INDIA | NA                                      |
| 106 | R | IC536494 | <i>T.durum</i>    | MS   | S  | R | R | R | NA   | INDIA | NA                                      |
| 107 | R | IC536412 | <i>T.aestivum</i> | MS   | S  | R | R | R | NA   | INDIA | NA                                      |
| 108 | R | IC536410 | <i>T.aestivum</i> | MS   | S  | R | R | R | NA   | INDIA | NA                                      |
| 109 | R | IC536040 | <i>T.durum</i>    | R    | S  | R | R | R | NA   | INDIA | NA                                      |
| 110 | R | IC536038 | <i>T.durum</i>    | R    | S  | R | R | R | NA   | INDIA | NA                                      |
| 111 | R | IC536036 | <i>T.durum</i>    | MS   | S  | R | R | R | NA   | INDIA | NA                                      |
| 112 | R | IC536035 | <i>T.durum</i>    | R    | S  | R | R | R | NA   | INDIA | NA                                      |
| 113 | R | IC536034 | <i>T.durum</i>    | MS   | S  | R | R | R | NA   | INDIA | NA                                      |
| 114 | R | IC536032 | <i>T.durum</i>    | MS   | S  | R | R | R | NA   | INDIA | NA                                      |
| 115 | R | IC536026 | <i>T.durum</i>    | R    | S  | R | R | R | NA   | INDIA | NA                                      |
| 116 | R | IC536020 | <i>T.durum</i>    | R    | S  | R | R | R | NA   | INDIA | NA                                      |
| 117 | R | IC536017 | <i>T.durum</i>    | R    | S  | R | R | R | NA   | INDIA | NA                                      |
| 118 | R | IC536016 | <i>T.durum</i>    | R    | S  | R | R | R | NA   | INDIA | NA                                      |
| 119 | R | IC536006 | <i>T.durum</i>    | R    | S  | R | R | R | NA   | INDIA | NA                                      |
| 120 | R | IC536000 | <i>T.durum</i>    | MS   | S  | R | R | R | NA   | INDIA | NA                                      |
| 121 | R | IC535909 | <i>T.durum</i>    | R    | MS | R | R | R | NA   | INDIA | NA                                      |
| 122 | R | IC535904 | <i>T.durum</i>    | R    | MS | R | R | R | NA   | INDIA | NA                                      |
| 123 | R | IC535878 | <i>T.durum</i>    | MS   | S  | R | R | R | NA   | INDIA | NA                                      |
| 124 | R | IC535849 | <i>T.durum</i>    | R    | S  | R | R | R | NA   | INDIA | NA                                      |
| 125 | R | IC535845 | <i>T.durum</i>    | >20S | S  | R | R | R | NA   | INDIA | NA                                      |
| 126 | R | IC535842 | <i>T.durum</i>    | MS   | MS | R | R | R | NA   | INDIA | NA                                      |
| 127 | R | IC535837 | <i>T.durum</i>    | R    | S  | R | R | R | NA   | INDIA | NA                                      |
| 128 | R | IC535828 | <i>T.durum</i>    | R    | S  | R | R | R | NA   | INDIA | NA                                      |
| 129 | R | IC535769 | <i>T.durum</i>    | <20S | S  | R | R | R | NA   | INDIA | NA                                      |
| 130 | R | IC535729 | <i>T.durum</i>    | R    | S  | R | R | R | NA   | INDIA | NA                                      |
| 131 | R | IC533697 | <i>T.aestivum</i> | R    | S  | R | R | R | NA   | INDIA | NA                                      |
| 132 | R | IC533696 | <i>T.aestivum</i> | R    | S  | R | R | R | NA   | INDIA | NA                                      |
| 133 | R | IC533694 | <i>T.aestivum</i> | R    | S  | R | R | R | NA   | INDIA | NA                                      |
| 134 | R | IC533692 | <i>T.aestivum</i> | R    | MS | R | R | R | NA   | INDIA | NA                                      |
| 135 | R | IC533689 | <i>T.aestivum</i> | R    | MS | R | R | R | NA   | INDIA | NA                                      |
| 136 | R | IC533687 | <i>T.aestivum</i> | R    | MS | R | R | R | NA   | INDIA | NA                                      |
| 137 | R | IC533684 | <i>T.aestivum</i> | R    | S  | R | R | R | NA   | INDIA | NA                                      |
| 138 | R | IC532584 | <i>T.durum</i>    | R    | S  | R | R | R | 1999 | INDIA | Lr19Lr22aLr50Yr5Yr15Yr36Yr48Sr2Sr13Sr24 |
| 139 | R | IC47027  | <i>T.aestivum</i> | R    | MS | R | R | R | 1981 | INDIA | Lr22aLr37Lr46Lr50Yr5Yr15Yr36Yr48Sr2Sr13 |
| 140 | R | IC445530 | <i>T.aestivum</i> | R    | S  | R | R | R | 2004 | INDIA | NA                                      |

|     |   |                |                   |      |      |   |   |   |      |        |                                                        |
|-----|---|----------------|-------------------|------|------|---|---|---|------|--------|--------------------------------------------------------|
| 141 | R | IC445529       | <i>T.aestivum</i> | R    | S    | R | R | R | 2004 | INDIA  | <i>NA</i>                                              |
| 142 | R | IC445526       | <i>T.aestivum</i> | R    | MS   | R | R | R | 2004 | INDIA  | <i>NA</i>                                              |
| 143 | R | IC445524       | <i>T.aestivum</i> | R    | MS   | R | R | R | 2004 | INDIA  | <i>NA</i>                                              |
| 144 | R | IC445511       | <i>T.aestivum</i> | R    | S    | R | R | R | 2004 | INDIA  | <i>NA</i>                                              |
| 145 | R | IC445508       | <i>T.aestivum</i> | R    | MS   | R | R | R | 2004 | INDIA  | <i>NA</i>                                              |
| 146 | R | IC445505       | <i>T.aestivum</i> | R    | S    | R | R | R | 2004 | INDIA  | <i>NA</i>                                              |
| 147 | R | IC445487       | <i>T.aestivum</i> | R    | S    | R | R | R | 2004 | INDIA  | <i>NA</i>                                              |
| 148 | R | IC445070       | <i>T.durum</i>    | R    | S    | R | R | R | 2004 | INDIA  | <i>NA</i>                                              |
| 149 | R | IC443634       | <i>T.aestivum</i> | R    | S    | R | R | R | 2004 | INDIA  | <i>NA</i>                                              |
| 150 | R | IC443629       | <i>T.aestivum</i> | R    | S    | R | R | R | 2004 | INDIA  | <i>NA</i>                                              |
| 151 | R | IC416314       | <i>T.durum</i>    | R    | S    | R | R | R | 2003 | INDIA  | <i>Lr19Lr22aLr32Lr46Yr5Yr15Yr36Yr48Sr2</i>             |
| 152 | R | IC416310       | <i>T.durum</i>    | R    | S    | R | R | R | 2003 | INDIA  | <i>Lr19Lr22aLr32Lr46Lr50Yr5Yr15Yr36Yr48</i>            |
| 153 | R | IC416298       | <i>T.durum</i>    | R    | MS   | R | R | R | 2003 | INDIA  | <i>Lr19Lr22aLr32Lr46Lr50Yr5Yr15Yr36Yr48Sr13</i>        |
| 154 | R | IC416254       | <i>T.aestivum</i> | R    | S    | R | R | R | 2003 | INDIA  | <i>NA</i>                                              |
| 155 | R | IC415859       | <i>T.aestivum</i> | R    | MR   | R | R | R | 2003 | INDIA  | <i>Lr22aLr32Lr46Lr50Yr5Yr15Yr36Yr48Sr2</i>             |
| 156 | R | IC405234       | <i>T.aestivum</i> | R    | S    | R | R | R | NA   | INDIA  | <i>NA</i>                                              |
| 157 | R | IC401962       | <i>T.durum</i>    | R    | S    | R | R | R | 2004 | INDIA  | <i>NA</i>                                              |
| 158 | R | IC397538       | <i>T.aestivum</i> | R    | S    | R | R | R | 2003 | INDIA  | <i>NA</i>                                              |
| 159 | R | IC333096       | <i>T.aestivum</i> | R    | MS   | R | R | R | 2001 | INDIA  | <i>Lr19Lr22aLr34Lr37Lr46Lr50Yr15Yr48Sr13</i>           |
| 160 | R | IC296490-FLW-4 | <i>T.aestivum</i> | >20S | NULL | R | R | R | 2000 | INDIA  | <i>NA</i>                                              |
| 161 | R | IC296436       | <i>T.aestivum</i> | >20S | MR   | R | R | R | 2000 | INDIA  | <i>NA</i>                                              |
| 162 | R | IC296429-D-895 | <i>T.aestivum</i> | <20S | S    | R | R | R | 2000 | INDIA  | <i>NA</i>                                              |
| 163 | R | IC290226       | <i>T.aestivum</i> | R    | S    | R | R | R | NA   | INDIA  | <i>NA</i>                                              |
| 164 | R | IC252945       | <i>T.aestivum</i> | MS   | MS   | R | R | R | 1999 | INDIA  | <i>Lr19Lr22aLr37Lr50Lr67Lr68Yr5Yr15Yr48Sr2Sr13Sr24</i> |
| 165 | R | IC145686       | <i>T.durum</i>    | R    | S    | R | R | R | NA   | INDIA  | <i>NA</i>                                              |
| 166 | R | IC111866       | <i>T.aestivum</i> | R    | S    | R | R | R | 1990 | INDIA  | <i>Lr22aLr37Lr46Lr50Yr5Yr15Yr36Yr48</i>                |
| 167 | R | EC592966       | <i>T.durum</i>    | R    | MR   | R | R | R | 2006 | MEXICO | <i>NA</i>                                              |
| 168 | R | EC577459       | <i>T.durum</i>    | R    | MS   | R | R | R | 2006 | NA     | <i>NA</i>                                              |
| 169 | R | EC577413       | <i>T.durum</i>    | MS   | MS   | R | R | R | 2006 | NA     | <i>NA</i>                                              |
| 170 | R | EC576740       | <i>T.aestivum</i> | >20S | S    | R | R | R | 2006 | NA     | <i>NA</i>                                              |
| 171 | R | EC575641       | <i>T.aestivum</i> | R    | S    | R | R | R | 2006 | NA     | <i>NA</i>                                              |
| 172 | R | EC575376       | <i>T.durum</i>    | R    | S    | R | R | R | 2006 | NA     | <i>NA</i>                                              |
| 173 | R | EC575375       | <i>T.durum</i>    | MS   | S    | R | R | R | 2006 | NA     | <i>NA</i>                                              |
| 174 | R | EC575374       | <i>T.durum</i>    | R    | S    | R | R | R | 2006 | NA     | <i>NA</i>                                              |
| 175 | R | EC575368       | <i>T.durum</i>    | R    | S    | R | R | R | 2006 | NA     | <i>NA</i>                                              |
| 176 | R | EC573868       | <i>T.aestivum</i> | MR   | MS   | R | R | R | 2006 | NA     | <i>NA</i>                                              |
| 177 | R | EC573767       | <i>T.durum</i>    | MS   | S    | R | R | R | 2006 | NA     | <i>NA</i>                                              |
| 178 | R | EC573650       | <i>T.aestivum</i> | R    | MS   | R | R | R | 2006 | NA     | <i>NA</i>                                              |
| 179 | R | EC573567       | <i>T.durum</i>    | R    | MS   | R | R | R | 2006 | NA     | <i>NA</i>                                              |
| 180 | R | EC573566       | <i>T.durum</i>    | R    | MS   | R | R | R | 2006 | NA     | <i>NA</i>                                              |
| 181 | R | EC573565       | <i>T.durum</i>    | R    | MS   | R | R | R | 2006 | NA     | <i>NA</i>                                              |
| 182 | R | EC534569       | <i>T.aestivum</i> | R    | MS   | R | R | R | 2003 | USA    | <i>NA</i>                                              |
| 183 | R | EC534568       | <i>T.aestivum</i> | R    | MS   | R | R | R | 2003 | USA    | <i>NA</i>                                              |
| 184 | R | EC534550       | <i>T.aestivum</i> | R    | MS   | R | R | R | 2003 | USA    | <i>NA</i>                                              |
| 185 | R | EC445450       | <i>T.durum</i>    | R    | MS   | R | R | R | 1999 | MEXICO | <i>NA</i>                                              |
| 186 | R | EC445414       | <i>T.durum</i>    | R    | S    | R | R | R | 1999 | MEXICO | <i>NA</i>                                              |
| 187 | R | EC445365       | <i>T.durum</i>    | R    | S    | R | R | R | 1999 | MEXICO | <i>NA</i>                                              |
| 188 | R | EC445363       | <i>T.durum</i>    | R    | S    | R | R | R | 1999 | MEXICO | <i>NA</i>                                              |
| 189 | R | EC445327       | <i>T.durum</i>    | R    | MS   | R | R | R | 1999 | MEXICO | <i>NA</i>                                              |
| 190 | R | EC445290       | <i>T.durum</i>    | R    | MR   | R | R | R | 1999 | MEXICO | <i>NA</i>                                              |
| 191 | R | EC445257       | <i>T.durum</i>    | R    | MS   | R | R | R | 1999 | MEXICO | <i>Lr22aLr50Yr5Yr15Yr36Yr48Sr2Sr13</i>                 |

|     |   |                |                   |      |    |   |   |   |      |        |                                                |
|-----|---|----------------|-------------------|------|----|---|---|---|------|--------|------------------------------------------------|
| 192 | R | EC445228       | <i>T.durum</i>    | R    | MS | R | R | R | 1999 | MEXICO | <i>NA</i>                                      |
| 193 | R | EC445220       | <i>T.durum</i>    | R    | S  | R | R | R | 1999 | MEXICO | <i>NA</i>                                      |
| 194 | R | EC445179       | <i>T.durum</i>    | R    | S  | R | R | R | 1999 | MEXICO | <i>NA</i>                                      |
| 195 | R | EC445178       | <i>T.durum</i>    | R    | S  | R | R | R | 1999 | MEXICO | <i>NA</i>                                      |
| 196 | R | EC445169       | <i>T.durum</i>    | R    | MS | R | R | R | 1999 | MEXICO | <i>NA</i>                                      |
| 197 | R | EC445160       | <i>T.durum</i>    | R    | S  | R | R | R | 1999 | MEXICO | <i>NA</i>                                      |
| 198 | R | EC445158       | <i>T.durum</i>    | R    | MS | R | R | R | 1999 | MEXICO | <i>NA</i>                                      |
| 199 | R | EC445122       | <i>T.durum</i>    | R    | S  | R | R | R | 1999 | MEXICO | <i>NA</i>                                      |
| 200 | R | EC445119       | <i>T.durum</i>    | R    | S  | R | R | R | 1999 | MEXICO | <i>NA</i>                                      |
| 201 | R | EC445118       | <i>T.durum</i>    | R    | MS | R | R | R | 1999 | MEXICO | <i>NA</i>                                      |
| 202 | R | EC445098       | <i>T.durum</i>    | R    | MS | R | R | R | 1999 | MEXICO | <i>NA</i>                                      |
| 203 | R | EC445089       | <i>T.durum</i>    | R    | MS | R | R | R | 1999 | MEXICO | <i>NA</i>                                      |
| 204 | R | EC444938       | <i>T.durum</i>    | R    | MS | R | R | R | 1999 | MEXICO | <i>NA</i>                                      |
| 205 | R | EC444907       | <i>T.durum</i>    | R    | MS | R | R | R | 1999 | MEXICO | <i>NA</i>                                      |
| 206 | R | EC444889       | <i>T.durum</i>    | R    | MR | R | R | R | 1999 | MEXICO | <i>NA</i>                                      |
| 207 | R | EC444847       | <i>T.durum</i>    | R    | S  | R | R | R | 1999 | MEXICO | <i>NA</i>                                      |
| 208 | R | EC444754       | <i>T.durum</i>    | R    | MS | R | R | R | 1999 | MEXICO | <i>NA</i>                                      |
| 209 | R | EC299283       | <i>T.durum</i>    | R    | MS | R | R | R | 1989 | SYRIA  | <i>NA</i>                                      |
| 210 | R | EC299253       | <i>T.durum</i>    | R    | S  | R | R | R | 1989 | SYRIA  | <i>NA</i>                                      |
| 211 | R | EC277637       | <i>T.durum</i>    | R    | S  | R | R | R | NA   | NA     | <i>NA</i>                                      |
| 212 | R | EC277355       | <i>T.durum</i>    | R    | S  | R | R | R | 1988 | MEXICO | <i>NA</i>                                      |
| 213 | R | EC277327       | <i>T.durum</i>    | R    | MS | R | R | R | 1988 | MEXICO | <i>NA</i>                                      |
| 214 | R | EC277323       | <i>T.durum</i>    | R    | S  | R | R | R | 1988 | MEXICO | <i>NA</i>                                      |
| 215 | R | EC277317       | <i>T.durum</i>    | R    | S  | R | R | R | 1988 | MEXICO | <i>NA</i>                                      |
| 216 | R | EC277315       | <i>T.durum</i>    | R    | S  | R | R | R | 1988 | MEXICO | <i>NA</i>                                      |
| 217 | R | EC277312       | <i>T.durum</i>    | R    | S  | R | R | R | 1988 | MEXICO | <i>NA</i>                                      |
| 218 | R | EC277308       | <i>T.durum</i>    | R    | S  | R | R | R | 1988 | MEXICO | <i>NA</i>                                      |
| 219 | R | EC277297       | <i>T.durum</i>    | R    | S  | R | R | R | 1988 | MEXICO | <i>NA</i>                                      |
| 220 | R | EC277281       | <i>T.durum</i>    | R    | S  | R | R | R | 1988 | MEXICO | <i>NA</i>                                      |
| 221 | R | EC277273       | <i>T.durum</i>    | R    | S  | R | R | R | 1988 | MEXICO | <i>NA</i>                                      |
| 222 | R | EC277260       | <i>T.durum</i>    | R    | S  | R | R | R | 1988 | MEXICO | <i>NA</i>                                      |
| 223 | R | EC277238       | <i>T.durum</i>    | R    | S  | R | R | R | 1988 | MEXICO | <i>NA</i>                                      |
| 224 | R | EC277233       | <i>T.durum</i>    | R    | S  | R | R | R | 1988 | MEXICO | <i>NA</i>                                      |
| 225 | R | EC277232       | <i>T.durum</i>    | R    | S  | R | R | R | 1988 | MEXICO | <i>NA</i>                                      |
| 226 | R | EC277222       | <i>T.durum</i>    | R    | S  | R | R | R | 1988 | MEXICO | <i>NA</i>                                      |
| 227 | R | EC277220       | <i>T.durum</i>    | R    | MS | R | R | R | 1988 | MEXICO | <i>NA</i>                                      |
| 228 | R | EC277217       | <i>T.durum</i>    | R    | S  | R | R | R | 1988 | MEXICO | <i>NA</i>                                      |
| 229 | R | EC277210       | <i>T.durum</i>    | R    | MS | R | R | R | 1988 | MEXICO | <i>NA</i>                                      |
| 230 | R | EC277204       | <i>T.durum</i>    | R    | S  | R | R | R | 1988 | MEXICO | <i>NA</i>                                      |
| 231 | R | EC277194       | <i>T.durum</i>    | R    | MS | R | R | R | 1988 | MEXICO | <i>NA</i>                                      |
| 232 | R | EC277189       | <i>T.durum</i>    | R    | MR | R | R | R | 1988 | MEXICO | <i>NA</i>                                      |
| 233 | R | EC277179       | <i>T.durum</i>    | MS   | S  | R | R | R | 1988 | MEXICO | <i>NA</i>                                      |
| 234 | R | EC277165       | <i>T.aestivum</i> | <20S | MS | R | R | R | 1988 | MEXICO | <i>NA</i>                                      |
| 235 | R | EC277164(3048) | <i>T.aestivum</i> | R    | S  | R | R | R | 1988 | MEXICO | <i>NA</i>                                      |
| 236 | R | EC277146       | <i>T.durum</i>    | R    | S  | R | R | R | 1988 | MEXICO | <i>NA</i>                                      |
| 237 | R | EC277119       | <i>T.durum</i>    | R    | MR | R | R | R | 1988 | MEXICO | <i>NA</i>                                      |
| 238 | R | EC277108       | <i>T.aestivum</i> | R    | MS | R | R | R | 1988 | MEXICO | <i>NA</i>                                      |
| 239 | R | EC277107       | <i>T.durum</i>    | R    | S  | R | R | R | 1988 | MEXICO | <i>Lr19Lr22aLr32Lr46Yr5Yr15Yr36Yr48Sr2Sr13</i> |
| 240 | R | EC277100       | <i>T.aestivum</i> | R    | MS | R | R | R | 1988 | MEXICO | <i>NA</i>                                      |
| 241 | R | EC277098       | <i>T.aestivum</i> | R    | MR | R | R | R | 1988 | MEXICO | <i>NA</i>                                      |
| 242 | R | EC277091       | <i>T.durum</i>    | R    | MS | R | R | R | 1988 | MEXICO | <i>NA</i>                                      |

|     |   |                |                   |    |    |   |   |   |      |        |                                                |
|-----|---|----------------|-------------------|----|----|---|---|---|------|--------|------------------------------------------------|
| 243 | R | EC277088       | <i>T.aestivum</i> | R  | MR | R | R | R | 1988 | MEXICO | <i>NA</i>                                      |
| 244 | R | EC277081       | <i>T.aestivum</i> | R  | MS | R | R | R | 1988 | MEXICO | <i>NA</i>                                      |
| 245 | R | EC277080       | <i>T.aestivum</i> | R  | MS | R | R | R | 1988 | MEXICO | <i>NA</i>                                      |
| 246 | R | EC277078       | <i>T.aestivum</i> | R  | MS | R | R | R | 1988 | MEXICO | <i>NA</i>                                      |
| 247 | R | EC277076       | <i>T.durum</i>    | R  | MS | R | R | R | 1988 | MEXICO | <i>NA</i>                                      |
| 248 | R | EC277066       | <i>T.aestivum</i> | R  | MS | R | R | R | 1988 | MEXICO | <i>NA</i>                                      |
| 249 | R | EC276992       | <i>T.durum</i>    | MS | S  | R | R | R | 1988 | MEXICO | <i>NA</i>                                      |
| 250 | R | EC276991       | <i>T.durum</i>    | MS | MS | R | R | R | 1988 | MEXICO | <i>NA</i>                                      |
| 251 | R | EC276988(3089) | <i>T.aestivum</i> | R  | MS | R | R | R | 1988 | MEXICO | <i>NA</i>                                      |
| 252 | R | EC276985       | <i>T.durum</i>    | R  | MS | R | R | R | 1988 | MEXICO | <i>NA</i>                                      |
| 253 | R | EC276924       | <i>T.durum</i>    | R  | S  | R | R | R | 1988 | MEXICO | <i>NA</i>                                      |
| 254 | R | EC276910       | <i>T.aestivum</i> | R  | S  | R | R | R | 1988 | MEXICO | <i>NA</i>                                      |
| 255 | R | EC276909(3082) | <i>T.aestivum</i> | R  | MS | R | R | R | 1988 | MEXICO | <i>NA</i>                                      |
| 256 | R | EC276892       | <i>T.durum</i>    | R  | S  | R | R | R | 1988 | MEXICO | <i>NA</i>                                      |
| 257 | R | EC276864       | <i>T.durum</i>    | R  | MS | R | R | R | 1988 | MEXICO | <i>NA</i>                                      |
| 258 | R | EC276861       | <i>T.durum</i>    | R  | S  | R | R | R | 1988 | MEXICO | <i>Lr22aLr32Lr46Lr50Yr15Yr36Yr48Sr13</i>       |
| 259 | R | EC276856       | <i>T.durum</i>    | R  | S  | R | R | R | 1988 | MEXICO | <i>NA</i>                                      |
| 260 | R | EC276838       | <i>T.durum</i>    | R  | S  | R | R | R | 1988 | MEXICO | <i>NA</i>                                      |
| 261 | R | EC276827       | <i>T.durum</i>    | R  | S  | R | R | R | 1988 | MEXICO | <i>NA</i>                                      |
| 262 | R | EC276821       | <i>T.durum</i>    | R  | S  | R | R | R | 1988 | MEXICO | <i>NA</i>                                      |
| 263 | R | EC276811       | <i>T.durum</i>    | R  | S  | R | R | R | 1988 | MEXICO | <i>NA</i>                                      |
| 264 | R | EC276795       | <i>T.durum</i>    | R  | MS | R | R | R | 1988 | MEXICO | <i>NA</i>                                      |
| 265 | R | EC276794       | <i>T.durum</i>    | R  | S  | R | R | R | 1988 | MEXICO | <i>NA</i>                                      |
| 266 | R | EC276790       | <i>T.durum</i>    | R  | S  | R | R | R | 1988 | MEXICO | <i>NA</i>                                      |
| 267 | R | EC276770       | <i>T.durum</i>    | R  | S  | R | R | R | 1988 | MEXICO | <i>NA</i>                                      |
| 268 | R | EC276765       | <i>T.durum</i>    | R  | MS | R | R | R | 1988 | MEXICO | <i>NA</i>                                      |
| 269 | R | EC276742       | <i>T.durum</i>    | R  | MS | R | R | R | 1988 | MEXICO | <i>NA</i>                                      |
| 270 | R | EC276725       | <i>T.durum</i>    | R  | MS | R | R | R | 1988 | MEXICO | <i>NA</i>                                      |
| 271 | R | EC276717       | <i>T.durum</i>    | MS | MS | R | R | R | 1988 | MEXICO | <i>NA</i>                                      |
| 272 | R | EC276713       | <i>T.durum</i>    | R  | S  | R | R | R | 1988 | MEXICO | <i>NA</i>                                      |
| 273 | R | EC276712       | <i>T.durum</i>    | R  | S  | R | R | R | 1988 | MEXICO | <i>NA</i>                                      |
| 274 | R | EC276710       | <i>T.durum</i>    | R  | MS | R | R | R | 1988 | MEXICO | <i>NA</i>                                      |
| 275 | R | EC276683       | <i>T.durum</i>    | R  | S  | R | R | R | 1988 | MEXICO | <i>NA</i>                                      |
| 276 | R | EC276635       | <i>T.aestivum</i> | R  | S  | R | R | R | 1988 | MEXICO | <i>NA</i>                                      |
| 277 | O | IC75215        | <i>T.aestivum</i> | R  | S  | R | R | R | 2002 | INDIA  | <i>Lr22aLr50Lr67Lr68Yr5Yr15Yr36Yr48Sr2Sr24</i> |
| 278 | O | IC549498       | <i>T.aestivum</i> | MS | MS | R | R | R | 2006 | INDIA  | <i>NA</i>                                      |
| 279 | O | IC543310       | <i>T.durum</i>    | R  | S  | R | R | R | NA   | INDIA  | <i>NA</i>                                      |
| 280 | O | IC543275(2310) | <i>T.durum</i>    | R  | S  | R | R | R | NA   | INDIA  | <i>NA</i>                                      |
| 281 | O | IC543252       | <i>T.durum</i>    | R  | MS | R | R | R | NA   | INDIA  | <i>NA</i>                                      |
| 282 | O | IC543248       | <i>T.aestivum</i> | MS | MS | R | R | R | NA   | INDIA  | <i>NA</i>                                      |
| 283 | O | IC543246       | <i>T.durum</i>    | R  | MS | R | R | R | NA   | INDIA  | <i>NA</i>                                      |
| 284 | O | IC543241       | <i>T.durum</i>    | R  | S  | R | R | R | NA   | INDIA  | <i>NA</i>                                      |
| 285 | O | IC543199       | <i>T.durum</i>    | R  | MS | R | R | R | NA   | INDIA  | <i>NA</i>                                      |
| 286 | O | IC543197       | <i>T.durum</i>    | MS | S  | R | R | R | NA   | INDIA  | <i>NA</i>                                      |
| 287 | O | IC543190       | <i>T.durum</i>    | MS | S  | R | R | R | NA   | INDIA  | <i>NA</i>                                      |
| 288 | O | IC543176       | <i>T.durum</i>    | MS | S  | R | R | R | NA   | INDIA  | <i>NA</i>                                      |
| 289 | O | IC543141       | <i>T.durum</i>    | R  | MS | R | R | R | NA   | INDIA  | <i>NA</i>                                      |
| 290 | O | IC543122       | <i>T.durum</i>    | MS | MS | R | R | R | NA   | INDIA  | <i>NA</i>                                      |
| 291 | O | IC543039       | <i>T.durum</i>    | R  | S  | R | R | R | NA   | INDIA  | <i>NA</i>                                      |
| 292 | O | IC543021       | <i>T.durum</i>    | MS | MR | R | R | R | NA   | INDIA  | <i>NA</i>                                      |
| 293 | O | IC543020       | <i>T.durum</i>    | R  | MR | R | R | R | NA   | INDIA  | <i>NA</i>                                      |

|     |   |                 |                   |      |      |   |   |   |      |       |                                           |
|-----|---|-----------------|-------------------|------|------|---|---|---|------|-------|-------------------------------------------|
| 294 | O | IC543013        | <i>T.durum</i>    | R    | S    | R | R | R | NA   | INDIA | NA                                        |
| 295 | O | IC542906        | <i>T.durum</i>    | MS   | MS   | R | R | R | NA   | INDIA | NA                                        |
| 296 | O | IC542861        | <i>T.durum</i>    | MS   | MS   | R | R | R | NA   | INDIA | NA                                        |
| 297 | O | IC542824        | <i>T.durum</i>    | R    | S    | R | R | R | NA   | INDIA | NA                                        |
| 298 | O | IC542823        | <i>T.durum</i>    | R    | S    | R | R | R | NA   | INDIA | NA                                        |
| 299 | O | IC542763        | <i>T.durum</i>    | MS   | S    | R | R | R | NA   | INDIA | NA                                        |
| 300 | O | IC542752        | <i>T.durum</i>    | MS   | MR   | R | R | R | NA   | INDIA | NA                                        |
| 301 | O | IC542670        | <i>T.durum</i>    | R    | S    | R | R | R | NA   | INDIA | NA                                        |
| 302 | O | IC542664        | <i>T.durum</i>    | R    | S    | R | R | R | NA   | INDIA | NA                                        |
| 303 | O | IC542619        | <i>T.durum</i>    | R    | S    | R | R | R | NA   | INDIA | NA                                        |
| 304 | O | IC542476        | <i>T.aestivum</i> | MS   | S    | R | R | R | NA   | INDIA | NA                                        |
| 305 | O | IC539598        | <i>T.aestivum</i> | R    | MS   | R | R | R | 2005 | INDIA | NA                                        |
| 306 | O | IC537351-HI8591 | <i>T.aestivum</i> | <20S | NULL | R | R | R | 2005 | INDIA | NA                                        |
| 307 | O | IC536411        | <i>T.aestivum</i> | MR   | S    | R | R | R | NA   | INDIA | NA                                        |
| 308 | O | IC536394        | <i>T.durum</i>    | R    | S    | R | R | R | NA   | INDIA | NA                                        |
| 309 | O | IC535983        | <i>T.durum</i>    | R    | MS   | R | R | R | NA   | INDIA | NA                                        |
| 310 | O | IC535945        | <i>T.durum</i>    | R    | S    | R | R | R | NA   | INDIA | NA                                        |
| 311 | O | IC535931        | <i>T.durum</i>    | R    | MS   | R | R | R | NA   | INDIA | NA                                        |
| 312 | O | IC535868        | <i>T.durum</i>    | R    | MS   | R | R | R | NA   | INDIA | NA                                        |
| 313 | O | IC535850        | <i>T.durum</i>    | R    | S    | R | R | R | NA   | INDIA | NA                                        |
| 314 | O | IC535756        | <i>T.durum</i>    | R    | S    | R | R | R | NA   | INDIA | NA                                        |
| 315 | O | IC535683        | <i>T.durum</i>    | MS   | S    | R | R | R | NA   | INDIA | NA                                        |
| 316 | O | IC535682        | <i>T.durum</i>    | MS   | S    | R | R | R | NA   | INDIA | NA                                        |
| 317 | O | IC534314        | <i>T.aestivum</i> | MS   | MS   | R | R | R | NA   | INDIA | NA                                        |
| 318 | O | IC531796        | <i>T.aestivum</i> | R    | MS   | R | R | R | NA   | INDIA | NA                                        |
| 319 | O | IC531572        | <i>T.aestivum</i> | R    | S    | R | R | R | NA   | INDIA | NA                                        |
| 320 | O | IC531248        | <i>T.aestivum</i> | R    | S    | R | R | R | NA   | INDIA | NA                                        |
| 321 | O | IC531182        | <i>T.aestivum</i> | R    | S    | R | R | R | NA   | INDIA | NA                                        |
| 322 | O | IC528923        | <i>T.aestivum</i> | R    | MR   | R | R | R | 2005 | INDIA | NA                                        |
| 323 | O | IC447515        | <i>T.aestivum</i> | R    | S    | R | R | R | 2004 | INDIA | NA                                        |
| 324 | O | IC445528        | <i>T.aestivum</i> | R    | S    | R | R | R | 2004 | INDIA | NA                                        |
| 325 | O | IC445523        | <i>T.aestivum</i> | R    | S    | R | R | R | 2004 | INDIA | NA                                        |
| 326 | O | IC445506        | <i>T.aestivum</i> | R    | S    | R | R | R | 2004 | INDIA | NA                                        |
| 327 | O | IC445395        | <i>T.aestivum</i> | R    | MS   | R | R | R | 2004 | INDIA | NA                                        |
| 328 | O | IC443734        | <i>T.aestivum</i> | R    | S    | R | R | R | 2004 | INDIA | NA                                        |
| 329 | O | IC416248        | <i>T.aestivum</i> | R    | MS   | R | R | R | 2003 | INDIA | Lr19Lr22aLr32Lr46Yr5Yr36Yr48Sr2           |
| 330 | O | IC416163        | <i>T.aestivum</i> | MS   | MS   | R | R | R | 2003 | INDIA | NA                                        |
| 331 | O | IC416031        | <i>T.aestivum</i> | R    | S    | R | R | R | 2003 | INDIA | NA                                        |
| 332 | O | IC415962        | <i>T.aestivum</i> | R    | S    | R | R | R | 2003 | INDIA | NA                                        |
| 333 | O | IC335812(4924)  | <i>T.aestivum</i> | MS   | S    | R | R | R | 2002 | INDIA | Lr19Lr22aLr46Lr50Yr5Yr36Yr48Sr13          |
| 334 | O | IC335784        | <i>T.aestivum</i> | R    | S    | R | R | R | 2002 | INDIA | Lr19Lr22aLr32Lr37Lr46Lr50Yr5Yr15Yr48Sr24  |
| 335 | O | IC335758        | <i>T.aestivum</i> | MS   | MS   | R | R | R | 2002 | INDIA | Lr19Lr22aLr46Lr50Yr5Yr15Yr36Yr48Sr13      |
| 336 | O | IC335754        | <i>T.aestivum</i> | MS   | S    | R | R | R | 2002 | INDIA | Lr19Lr22aLr32Lr46Lr50Lr67Yr36Yr48Sr13Sr24 |
| 337 | O | IC321981        | <i>T.aestivum</i> | R    | MS   | R | R | R | 2001 | INDIA | Lr19Lr22aLr32Lr37Lr46Yr5Yr15Yr36Yr48Sr2   |
| 338 | O | IC317471        | <i>T.aestivum</i> | R    | S    | R | R | R | 2001 | INDIA | NA                                        |
| 339 | O | IC296439        | <i>T.aestivum</i> | >20S | NULL | R | R | R | 2000 | INDIA | Lr19Lr22aLr46Lr68Yr15Yr48Sr2              |
| 340 | O | IC296428-D879   | <i>T.aestivum</i> | >20S | S    | R | R | R | 2000 | INDIA | NA                                        |
| 341 | O | IC290296        | <i>T.aestivum</i> | R    | S    | R | R | R | NA   | INDIA | NA                                        |
| 342 | O | IC290180        | <i>T.aestivum</i> | R    | S    | R | R | R | NA   | INDIA | NA                                        |
| 343 | O | IC260877        | <i>T.aestivum</i> | R    | MS   | R | R | R | 2000 | INDIA | NA                                        |
| 344 | O | IC252980        | <i>T.aestivum</i> | R    | S    | R | R | R | 1999 | INDIA | Lr19Lr22aLr46Lr50Lr68Sr2                  |

|     |   |          |                   |    |    |   |   |   |      |           |                                            |
|-----|---|----------|-------------------|----|----|---|---|---|------|-----------|--------------------------------------------|
| 345 | O | IC252810 | <i>T.aestivum</i> | R  | MS | R | R | R | 1999 | INDIA     | <i>Lr19Lr22aLr32Lr46Yr5Yr15Yr36Sr2Sr13</i> |
| 346 | O | IC252594 | <i>T.aestivum</i> | R  | S  | R | R | R | 1999 | INDIA     | <i>Lr32Yr5Yr15Yr36Sr2Sr13</i>              |
| 347 | O | EC609593 | <i>T.aestivum</i> | MS | S  | R | R | R | 2007 | AUSTRALIA | <i>NA</i>                                  |
| 348 | O | EC609590 | <i>T.aestivum</i> | MS | S  | R | R | R | 2007 | AUSTRALIA | <i>NA</i>                                  |
| 349 | O | EC609415 | <i>T.aestivum</i> | R  | S  | R | R | R | 2007 | SERBIA    | <i>NA</i>                                  |
| 350 | O | EC578059 | <i>T.aestivum</i> | R  | MS | R | R | R | 2006 | NA        | <i>NA</i>                                  |
| 351 | O | EC577958 | <i>T.aestivum</i> | R  | MS | R | R | R | 2006 | NA        | <i>NA</i>                                  |
| 352 | O | EC577531 | <i>T.durum</i>    | R  | R  | R | R | R | 2006 | NA        | <i>NA</i>                                  |
| 353 | O | EC577457 | <i>T.durum</i>    | R  | MS | R | R | R | 2006 | NA        | <i>NA</i>                                  |
| 354 | O | EC577425 | <i>T.durum</i>    | MS | S  | R | R | R | 2006 | NA        | <i>NA</i>                                  |
| 355 | O | EC577424 | <i>T.durum</i>    | MS | S  | R | R | R | 2006 | NA        | <i>NA</i>                                  |
| 356 | O | EC577419 | <i>T.durum</i>    | MS | S  | R | R | R | 2006 | NA        | <i>NA</i>                                  |
| 357 | O | EC577417 | <i>T.durum</i>    | MS | MS | R | R | R | 2006 | NA        | <i>NA</i>                                  |
| 358 | O | EC576915 | <i>T.aestivum</i> | R  | S  | R | R | R | 2006 | NA        | <i>NA</i>                                  |
| 359 | O | EC576009 | <i>T.aestivum</i> | R  | S  | R | R | R | 2006 | NA        | <i>NA</i>                                  |
| 360 | O | EC575602 | <i>T.aestivum</i> | R  | S  | R | R | R | 2006 | NA        | <i>NA</i>                                  |
| 361 | O | EC575373 | <i>T.durum</i>    | MR | MS | R | R | R | 2006 | NA        | <i>NA</i>                                  |
| 362 | O | EC575357 | <i>T.aestivum</i> | MS | S  | R | R | R | 2006 | NA        | <i>NA</i>                                  |
| 363 | O | EC575154 | <i>T.aestivum</i> | R  | MS | R | R | R | 2006 | NA        | <i>NA</i>                                  |
| 364 | O | EC574831 | <i>T.aestivum</i> | R  | MR | R | R | R | 2006 | NA        | <i>NA</i>                                  |
| 365 | O | EC574433 | <i>T.aestivum</i> | R  | MS | R | R | R | 2006 | NA        | <i>NA</i>                                  |
| 366 | O | EC574430 | <i>T.aestivum</i> | R  | MR | R | R | R | 2006 | NA        | <i>NA</i>                                  |
| 367 | O | EC573944 | <i>T.aestivum</i> | MS | S  | R | R | R | 2006 | NA        | <i>NA</i>                                  |
| 368 | O | EC573930 | <i>T.aestivum</i> | MS | MS | R | R | R | 2006 | NA        | <i>NA</i>                                  |
| 369 | O | EC573852 | <i>T.durum</i>    | R  | S  | R | R | R | 2006 | NA        | <i>NA</i>                                  |
| 370 | O | EC573851 | <i>T.durum</i>    | R  | MS | R | R | R | 2006 | NA        | <i>NA</i>                                  |
| 371 | O | EC573577 | <i>T.durum</i>    | MS | S  | R | R | R | 2006 | NA        | <i>NA</i>                                  |
| 372 | O | EC573576 | <i>T.durum</i>    | MS | S  | R | R | R | 2006 | NA        | <i>NA</i>                                  |
| 373 | O | EC573568 | <i>T.durum</i>    | R  | S  | R | R | R | 2006 | NA        | <i>NA</i>                                  |
| 374 | O | EC558775 | <i>T.aestivum</i> | R  | S  | R | R | R | 2005 | MEXICO    | <i>NA</i>                                  |
| 375 | O | EC556486 | <i>T.aestivum</i> | MS | S  | R | R | R | 2005 | AUSTRALIA | <i>NA</i>                                  |
| 376 | O | EC556454 | <i>T.aestivum</i> | R  | S  | R | R | R | 2005 | AUSTRALIA | <i>NA</i>                                  |
| 377 | O | EC534553 | <i>T.aestivum</i> | R  | MS | R | R | R | 2003 | USA       | <i>NA</i>                                  |
| 378 | O | EC534549 | <i>T.aestivum</i> | R  | MS | R | R | R | 2003 | USA       | <i>NA</i>                                  |
| 379 | O | EC534503 | <i>T.aestivum</i> | R  | MS | R | R | R | 2003 | USA       | <i>NA</i>                                  |
| 380 | O | EC534499 | <i>T.aestivum</i> | R  | MS | R | R | R | 2003 | USA       | <i>NA</i>                                  |
| 381 | O | EC534494 | <i>T.aestivum</i> | R  | S  | R | R | R | 2003 | USA       | <i>NA</i>                                  |
| 382 | O | EC445400 | <i>T.durum</i>    | R  | S  | R | R | R | 1999 | MEXICO    | <i>NA</i>                                  |
| 383 | O | EC415840 | <i>T.aestivum</i> | R  | MS | R | R | R | 1998 | USA       | <i>NA</i>                                  |
| 384 | O | EC339612 | <i>T.aestivum</i> | R  | R  | R | R | R | 1992 | USA       | <i>NA</i>                                  |
| 385 | O | EC339606 | <i>T.aestivum</i> | R  | MR | R | R | R | 1992 | USA       | <i>NA</i>                                  |
| 386 | O | EC299278 | <i>T.durum</i>    | R  | S  | R | R | R | 1989 | SYRIA     | <i>NA</i>                                  |
| 387 | O | EC299242 | <i>T.durum</i>    | R  | MR | R | R | R | 1989 | SYRIA     | <i>NA</i>                                  |
| 388 | O | EC299239 | <i>T.durum</i>    | R  | MS | R | R | R | 1989 | SYRIA     | <i>NA</i>                                  |
| 389 | O | EC277342 | <i>T.durum</i>    | R  | MS | R | R | R | 1988 | MEXICO    | <i>NA</i>                                  |
| 390 | O | EC277340 | <i>T.durum</i>    | R  | S  | R | R | R | 1988 | MEXICO    | <i>NA</i>                                  |
| 391 | O | EC277336 | <i>T.durum</i>    | R  | S  | R | R | R | 1988 | MEXICO    | <i>NA</i>                                  |
| 392 | O | EC277334 | <i>T.durum</i>    | R  | S  | R | R | R | 1988 | MEXICO    | <i>NA</i>                                  |
| 393 | O | EC277329 | <i>T.durum</i>    | R  | MS | R | R | R | 1988 | MEXICO    | <i>NA</i>                                  |
| 394 | O | EC277270 | <i>T.durum</i>    | R  | S  | R | R | R | 1988 | MEXICO    | <i>NA</i>                                  |
| 395 | O | EC277227 | <i>T.durum</i>    | MS | MS | R | R | R | 1988 | MEXICO    | <i>NA</i>                                  |



|     |   |                |                   |      |    |   |   |   |      |        |                                                         |
|-----|---|----------------|-------------------|------|----|---|---|---|------|--------|---------------------------------------------------------|
| 396 | O | EC277213       | <i>T.durum</i>    | R    | MS | R | R | R | 1988 | MEXICO | <i>NA</i>                                               |
| 397 | O | EC277179       | <i>T.durum</i>    | MS   | S  | R | R | R | 1988 | MEXICO | <i>NA</i>                                               |
| 398 | O | EC277166       | <i>T.aestivum</i> | R    | MS | R | R | R | 1988 | MEXICO | <i>NA</i>                                               |
| 399 | O | EC277156       | <i>T.aestivum</i> | R    | S  | R | R | R | 1988 | MEXICO | <i>NA</i>                                               |
| 400 | O | EC277153       | <i>T.aestivum</i> | R    | MS | R | R | R | 1988 | MEXICO | <i>NA</i>                                               |
| 401 | O | EC277136       | <i>T.durum</i>    | R    | S  | R | R | R | 1988 | MEXICO | <i>NA</i>                                               |
| 402 | O | EC277122       | <i>T.aestivum</i> | R    | S  | R | R | R | 1988 | MEXICO | <i>NA</i>                                               |
| 403 | O | EC277116       | <i>T.aestivum</i> | R    | S  | R | R | R | 1988 | MEXICO | <i>NA</i>                                               |
| 404 | O | EC277111(2532) | <i>T.aestivum</i> | R    | MS | R | R | R | 1988 | MEXICO | <i>NA</i>                                               |
| 405 | O | EC277111(168)  | <i>T.aestivum</i> | R    | MS | R | R | R | 1988 | MEXICO | <i>NA</i>                                               |
| 406 | O | EC277062       | <i>T.aestivum</i> | R    | MS | R | R | R | 1988 | MEXICO | <i>NA</i>                                               |
| 407 | O | EC277059       | <i>T.aestivum</i> | R    | S  | R | R | R | 1988 | MEXICO | <i>NA</i>                                               |
| 408 | O | EC277044       | <i>T.durum</i>    | R    | MS | R | R | R | 1988 | MEXICO | <i>NA</i>                                               |
| 409 | O | EC277006       | <i>T.aestivum</i> | R    | S  | R | R | R | 1988 | MEXICO | <i>NA</i>                                               |
| 410 | O | EC276987       | <i>T.aestivum</i> | R    | MS | R | R | R | 1988 | MEXICO | <i>NA</i>                                               |
| 411 | O | EC276983       | <i>T.aestivum</i> | R    | MS | R | R | R | 1988 | MEXICO | <i>NA</i>                                               |
| 412 | O | EC276957       | <i>T.aestivum</i> | R    | MS | R | R | R | 1988 | MEXICO | <i>NA</i>                                               |
| 413 | O | EC276925       | <i>T.durum</i>    | R    | MS | R | R | R | 1988 | MEXICO | <i>NA</i>                                               |
| 414 | O | EC276912       | <i>T.aestivum</i> | R    | S  | R | R | R | 1988 | MEXICO | <i>NA</i>                                               |
| 415 | O | EC276889(2426) | <i>T.aestivum</i> | MS   | S  | R | R | R | 1988 | MEXICO | <i>NA</i>                                               |
| 416 | O | EC276881       | <i>T.aestivum</i> | R    | S  | R | R | R | 1988 | MEXICO | <i>NA</i>                                               |
| 417 | O | EC276858       | <i>T.aestivum</i> | <20S | MS | R | R | R | 1988 | MEXICO | <i>NA</i>                                               |
| 418 | O | EC276854       | <i>T.durum</i>    | R    | S  | R | R | R | 1988 | MEXICO | <i>NA</i>                                               |
| 419 | O | EC276804       | <i>T.durum</i>    | R    | S  | R | R | R | 1988 | MEXICO | <i>NA</i>                                               |
| 420 | O | EC276801       | <i>T.durum</i>    | R    | S  | R | R | R | 1988 | MEXICO | <i>NA</i>                                               |
| 421 | O | EC276792       | <i>T.durum</i>    | R    | S  | R | R | R | 1988 | MEXICO | <i>NA</i>                                               |
| 422 | O | EC276772       | <i>T.durum</i>    | R    | MS | R | R | R | 1988 | MEXICO | <i>NA</i>                                               |
| 423 | O | EC276771       | <i>T.durum</i>    | R    | MR | R | R | R | 1988 | MEXICO | <i>NA</i>                                               |
| 424 | O | EC276761       | <i>T.aestivum</i> | MS   | MS | R | R | R | 1988 | MEXICO | <i>NA</i>                                               |
| 425 | O | EC276761       | <i>T.aestivum</i> | MS   | MS | R | R | R | 1988 | MEXICO | <i>NA</i>                                               |
| 426 | O | EC276755(3057) | <i>T.aestivum</i> | R    | S  | R | R | R | 1988 | MEXICO | <i>NA</i>                                               |
| 427 | O | EC276755(2399) | <i>T.aestivum</i> | R    | S  | R | R | R | 1988 | MEXICO | <i>NA</i>                                               |
| 428 | O | EC276741       | <i>T.durum</i>    | <20S | S  | R | R | R | 1988 | MEXICO | <i>NA</i>                                               |
| 429 | O | EC276739       | <i>T.durum</i>    | R    | S  | R | R | R | 1988 | MEXICO | <i>NA</i>                                               |
| 430 | O | EC276731       | <i>T.durum</i>    | R    | MS | R | R | R | 1988 | MEXICO | <i>NA</i>                                               |
| 431 | O | EC276715       | <i>T.durum</i>    | MS   | S  | R | R | R | 1988 | MEXICO | <i>NA</i>                                               |
| 432 | O | EC276693       | <i>T.durum</i>    | R    | MS | R | R | R | 1988 | MEXICO | <i>NA</i>                                               |
| 433 | O | EC276677       | <i>T.durum</i>    | R    | S  | R | R | R | 1988 | MEXICO | <i>NA</i>                                               |
| 434 | O | EC276670       | <i>T.durum</i>    | R    | S  | R | R | R | 1988 | MEXICO | <i>NA</i>                                               |
| 435 | O | EC276663(2499) | <i>T.durum</i>    | R    | MS | R | R | R | 1988 | MEXICO | <i>NA</i>                                               |
| 436 | O | EC276662       | <i>T.durum</i>    | R    | MS | R | R | R | 1988 | MEXICO | <i>NA</i>                                               |
| 437 | O | EC276646       | <i>T.durum</i>    | R    | R  | R | R | R | 1988 | MEXICO | <i>NA</i>                                               |
| 438 | O | EC218001       | <i>T.aestivum</i> | R    | MS | R | R | R | 2012 | USA    | <i>NA</i>                                               |
| 439 | O | EC217993       | <i>T.aestivum</i> | R    | S  | R | R | R | 1987 | USA    | <i>Lr22aLr46Lr67Yr5Yr15Yr48Sr13</i>                     |
| 440 | O | EC217987       | <i>T.aestivum</i> | R    | MS | R | R | R | 2012 | USA    | <i>NA</i>                                               |
| 441 | O | EC1780711      | <i>T.aestivum</i> | MS   | MS | R | R | R | NA   | NA     | <i>NA</i>                                               |
| 442 | O | EC177849       | <i>T.aestivum</i> | MS   | MS | R | R | R | 1986 | MEXICO | <i>NA</i>                                               |
| 443 | O | EC13624        | <i>T.aestivum</i> | R    | MS | R | R | R | 1958 | ITALY  | <i>NA</i>                                               |
| 444 | O | EC11407        | <i>T.aestivum</i> | R    | S  | R | R | R | 1956 | USA    | <i>Lr22aLr32Lr46Lr50Lr67Lr68Yr15Yr36Yr48Sr2Sr13Sr24</i> |
| 445 | O | EC11163        | <i>T.aestivum</i> | R    | S  | R | R | R | 1956 | USA    | <i>Lr22aLr37Lr46Yr5Yr15Yr48Sr13</i>                     |
| 446 | O | EC11159        | <i>T.aestivum</i> | R    | MR | R | R | R | 1956 | USA    | <i>Lr19Lr22aLr32Lr50Yr5Yr15Yr36Yr48Sr2</i>              |

|     |    |                |                   |      |    |   |   |   |      |           |                                             |
|-----|----|----------------|-------------------|------|----|---|---|---|------|-----------|---------------------------------------------|
| 447 | N  | IC543360       | <i>T.aestivum</i> | R    | MR | R | R | R | NA   | INDIA     | <i>NA</i>                                   |
| 448 | N  | IC542941       | <i>T.durum</i>    | R    | MS | R | R | R | NA   | INDIA     | <i>NA</i>                                   |
| 449 | N  | IC539532       | <i>T.aestivum</i> | R    | MS | R | R | R | 2005 | INDIA     | <i>NA</i>                                   |
| 450 | N  | IC536495       | <i>T.durum</i>    | R    | MS | R | R | R | NA   | INDIA     | <i>NA</i>                                   |
| 451 | N  | IC536037       | <i>T.durum</i>    | MS   | S  | R | R | R | NA   | INDIA     | <i>NA</i>                                   |
| 452 | N  | IC535336       | <i>T.aestivum</i> | R    | MS | R | R | R | NA   | INDIA     | <i>NA</i>                                   |
| 453 | N  | IC535119       | <i>T.dicoccum</i> | R    | MR | R | R | R | NA   | INDIA     | <i>NA</i>                                   |
| 454 | N  | IC535001       | <i>T.aestivum</i> | R    | MR | R | R | R | NA   | INDIA     | <i>NA</i>                                   |
| 455 | N  | IC533632       | <i>T.aestivum</i> | R    | MS | R | R | R | NA   | INDIA     | <i>NA</i>                                   |
| 456 | N  | IC531465       | <i>T.aestivum</i> | MR   | S  | R | R | R | NA   | INDIA     | <i>NA</i>                                   |
| 457 | N  | IC531267       | <i>T.aestivum</i> | R    | S  | R | R | R | NA   | INDIA     | <i>NA</i>                                   |
| 458 | N  | IC529644       | <i>T.aestivum</i> | R    | MR | R | R | R | 2005 | INDIA     | <i>NA</i>                                   |
| 459 | N  | IC529353       | <i>T.aestivum</i> | R    | R  | R | R | R | 2005 | INDIA     | <i>NA</i>                                   |
| 460 | N  | IC529311       | <i>T.aestivum</i> | R    | R  | R | R | R | 2005 | INDIA     | <i>NA</i>                                   |
| 461 | N  | IC529036       | <i>T.aestivum</i> | R    | MR | R | R | R | 2005 | INDIA     | <i>NA</i>                                   |
| 462 | N  | IC529035       | <i>T.aestivum</i> | R    | MR | R | R | R | 2005 | INDIA     | <i>NA</i>                                   |
| 463 | N  | IC529030       | <i>T.aestivum</i> | R    | MR | R | R | R | 2005 | INDIA     | <i>NA</i>                                   |
| 464 | N  | IC529017       | <i>T.aestivum</i> | R    | MR | R | R | R | 2005 | INDIA     | <i>NA</i>                                   |
| 465 | N  | IC528997       | <i>T.aestivum</i> | R    | R  | R | R | R | 2005 | INDIA     | <i>NA</i>                                   |
| 466 | N  | IC528922       | <i>T.aestivum</i> | R    | MR | R | R | R | 2005 | INDIA     | <i>NA</i>                                   |
| 467 | N  | IC49752        | <i>T.aestivum</i> | R    | MR | R | R | R | NA   | INDIA     | <i>NA</i>                                   |
| 468 | N  | IC49606        | <i>T.aestivum</i> | R    | MS | R | R | R | NA   | INDIA     | <i>NA</i>                                   |
| 469 | N  | IC41877        | <i>T.aestivum</i> | R    | MS | R | R | R | NA   | INDIA     | <i>NA</i>                                   |
| 470 | N  | IC406690       | <i>T.aestivum</i> | R    | MS | R | R | R | 2003 | INDIA     | <i>NA</i>                                   |
| 471 | N  | IC402025       | <i>T.aestivum</i> | R    | MR | R | R | R | NA   | INDIA     | <i>NA</i>                                   |
| 472 | N  | IC401998       | <i>T.aestivum</i> | R    | MR | R | R | R | 2004 | INDIA     | <i>NA</i>                                   |
| 473 | N  | IC329584       | <i>T.aestivum</i> | R    | S  | R | R | R | 2001 | INDIA     | <i>Lr22aLr37Lr46Lr50Lr68Yr15Yr36Yr48Sr2</i> |
| 474 | N  | IC296489-FLW-3 | <i>T.aestivum</i> | >20S | S  | R | R | R | 2000 | INDIA     | <i>NA</i>                                   |
| 475 | N  | IC24177        | <i>T.aestivum</i> | R    | MS | R | R | R | NA   | INDIA     | <i>NA</i>                                   |
| 476 | N  | IC138910       | <i>T.aestivum</i> | R    | S  | R | R | R | NA   | INDIA     | <i>NA</i>                                   |
| 477 | N  | EC582265       | <i>T.aestivum</i> | R    | MR | R | R | R | 2006 | USA       | <i>NA</i>                                   |
| 478 | N  | EC574904       | <i>T.aestivum</i> | R    | MS | R | R | R | 2006 | NA        | <i>NA</i>                                   |
| 479 | N  | EC574392       | <i>T.aestivum</i> | MR   | MS | R | R | R | 2006 | NA        | <i>NA</i>                                   |
| 480 | N  | EC556495       | <i>T.aestivum</i> | R    | MS | R | R | R | 2005 | AUSTRALIA | <i>NA</i>                                   |
| 481 | N  | EC534535       | <i>T.aestivum</i> | R    | S  | R | R | R | 2003 | USA       | <i>NA</i>                                   |
| 482 | N  | EC483033       | <i>T.aestivum</i> | R    | S  | R | R | R | 2001 | MEXICO    | <i>NA</i>                                   |
| 483 | N  | EC483024       | <i>T.aestivum</i> | R    | S  | R | R | R | 2001 | MEXICO    | <i>NA</i>                                   |
| 484 | N  | EC444925       | <i>T.durum</i>    | R    | MS | R | R | R | 1999 | MEXICO    | <i>NA</i>                                   |
| 485 | N  | EC415825       | <i>T.aestivum</i> | R    | S  | R | R | R | 1998 | USA       | <i>NA</i>                                   |
| 486 | N  | EC299244       | <i>T.durum</i>    | R    | S  | R | R | R | 1989 | SYRIA     | <i>NA</i>                                   |
| 487 | N  | EC299236       | <i>T.durum</i>    | R    | S  | R | R | R | 1989 | SYRIA     | <i>NA</i>                                   |
| 488 | N  | EC277080       | <i>T.aestivum</i> | R    | MS | R | R | R | 1988 | MEXICO    | <i>NA</i>                                   |
| 489 | N  | EC277060       | <i>T.durum</i>    | R    | S  | R | R | R | 1988 | MEXICO    | <i>NA</i>                                   |
| 490 | N  | EC276982       | <i>T.durum</i>    | R    | MS | R | R | R | 1988 | MEXICO    | <i>NA</i>                                   |
| 491 | N  | EC175090       | <i>T.aestivum</i> | MS   | MS | R | R | R | NA   | NA        | <i>NA</i>                                   |
| 492 | BR | IC549485       | <i>T.durum</i>    | R    | MS | R | R | R | 2006 | INDIA     | <i>NA</i>                                   |
| 493 | BR | IC543416       | <i>T.aestivum</i> | R    | MS | R | R | R | NA   | INDIA     | <i>NA</i>                                   |
| 494 | BR | IC543413       | <i>T.aestivum</i> | R    | MS | R | R | R | NA   | INDIA     | <i>NA</i>                                   |
| 495 | BR | IC543403       | <i>T.aestivum</i> | MS   | MS | R | R | R | NA   | INDIA     | <i>NA</i>                                   |
| 496 | BR | IC543040(4322) | <i>T.durum</i>    | MS   | S  | R | R | R | NA   | INDIA     | <i>NA</i>                                   |
| 497 | BR | IC543031       | <i>T.durum</i>    | MS   | S  | R | R | R | NA   | INDIA     | <i>NA</i>                                   |

|     |    |                  |                   |      |      |   |   |   |      |        |                                                    |
|-----|----|------------------|-------------------|------|------|---|---|---|------|--------|----------------------------------------------------|
| 498 | BR | IC542845         | <i>T.durum</i>    | MS   | S    | R | R | R | NA   | INDIA  | <i>NA</i>                                          |
| 499 | BR | IC536042         | <i>T.durum</i>    | R    | S    | R | R | R | NA   | INDIA  | <i>NA</i>                                          |
| 500 | BR | IC536041         | <i>T.durum</i>    | MS   | S    | R | R | R | NA   | INDIA  | <i>NA</i>                                          |
| 501 | BR | IC536039(4315)   | <i>T.durum</i>    | MS   | S    | R | R | R | NA   | INDIA  | <i>NA</i>                                          |
| 502 | BR | IC536039(2244)   | <i>T.durum</i>    | MS   | S    | R | R | R | NA   | INDIA  | <i>NA</i>                                          |
| 503 | BR | IC536030         | <i>T.durum</i>    | R    | S    | R | R | R | NA   | INDIA  | <i>NA</i>                                          |
| 504 | BR | IC535786         | <i>T.durum</i>    | MS   | MS   | R | R | R | NA   | INDIA  | <i>NA</i>                                          |
| 505 | BR | IC533686         | <i>T.aestivum</i> | R    | MS   | R | R | R | NA   | INDIA  | <i>NA</i>                                          |
| 506 | BR | IC533685         | <i>T.aestivum</i> | R    | S    | R | R | R | NA   | INDIA  | <i>NA</i>                                          |
| 507 | BR | IC533682         | <i>T.aestivum</i> | R    | MS   | R | R | R | NA   | INDIA  | <i>NA</i>                                          |
| 508 | BR | IC470829-RNB1001 | <i>T.aestivum</i> | >20S | NULL | R | R | R | 2005 | INDIA  | <i>NA</i>                                          |
| 509 | BR | IC445507         | <i>T.aestivum</i> | R    | MS   | R | R | R | 2004 | INDIA  | <i>NA</i>                                          |
| 510 | BR | IC443689         | <i>T.aestivum</i> | R    | S    | R | R | R | 2004 | INDIA  | <i>NA</i>                                          |
| 511 | BR | IC416364         | <i>T.durum</i>    | R    | MR   | R | R | R | 2003 | INDIA  | <i>Lr22aLr46Lr50Yr5Yr15Yr36Yr48Sr13</i>            |
| 512 | BR | IC416095         | <i>T.aestivum</i> | R    | S    | R | R | R | 2003 | INDIA  | <i>Lr22aLr37Lr46Lr50Yr5Yr15Yr36Yr48</i>            |
| 513 | BR | IC415887         | <i>T.aestivum</i> | R    | S    | R | R | R | 2003 | INDIA  | <i>Lr22aLr37Lr50Lr67Yr5Yr15Yr36Yr48Sr2</i>         |
| 514 | BR | IC296491-FLW-5   | <i>T.aestivum</i> | >20S | S    | R | R | R | 2000 | INDIA  | <i>Lr22aLr32Lr46Lr50Yr15Yr36Yr48Sr13</i>           |
| 515 | BR | EC592964         | <i>T.durum</i>    | R    | MR   | R | R | R | 2006 | MEXICO | <i>NA</i>                                          |
| 516 | BR | EC592963         | <i>T.durum</i>    | R    | MS   | R | R | R | 2006 | MEXICO | <i>NA</i>                                          |
| 517 | BR | EC575367         | <i>T.durum</i>    | MS   | S    | R | R | R | 2006 | NA     | <i>Lr19Lr22aLr46Lr68Yr15Yr36Yr48</i>               |
| 518 | BR | EC575366         | <i>T.aestivum</i> | MS   | MS   | R | R | R | 2006 | NA     | <i>Lr22aLr34Lr46Lr50Yr15Yr36Sr13</i>               |
| 519 | BR | EC575360         | <i>T.aestivum</i> | MS   | MS   | R | R | R | 2006 | NA     | <i>Lr22aLr37Lr46Yr15Yr36Yr48Sr13</i>               |
| 520 | BR | EC575358         | <i>T.aestivum</i> | MS   | S    | R | R | R | 2006 | NA     | <i>Lr19Lr22aLr37Lr46Lr50Yr5Yr15Yr48Sr2</i>         |
| 521 | BR | EC574765         | <i>T.durum</i>    | MR   | S    | R | R | R | 2006 | NA     | <i>Lr22aLr32Lr46Sr13</i>                           |
| 522 | BR | EC574394         | <i>T.durum</i>    | R    | S    | R | R | R | 2006 | NA     | <i>Lr22aLr67Lr68Yr5Yr15Yr48Sr2</i>                 |
| 523 | BR | EC573647         | <i>T.aestivum</i> | R    | MS   | R | R | R | 2006 | NA     | <i>Lr19Lr22aLr46Lr50Lr67Lr68Yr15Yr48Sr13</i>       |
| 524 | BR | EC445357         | <i>T.durum</i>    | R    | MR   | R | R | R | 1999 | MEXICO | <i>NA</i>                                          |
| 525 | BR | EC445280         | <i>T.durum</i>    | R    | MS   | R | R | R | 1999 | MEXICO | <i>Lr22aLr37Lr50Yr5Yr15Yr36Yr48Sr2Sr13</i>         |
| 526 | BR | EC445261         | <i>T.durum</i>    | R    | S    | R | R | R | 1999 | MEXICO | <i>Lr22aLr46Sr2</i>                                |
| 527 | BR | EC445209         | <i>T.durum</i>    | R    | S    | R | R | R | 1999 | MEXICO | <i>Lr19Lr22aLr32Lr46Lr50Yr5Yr36Yr48</i>            |
| 528 | BR | EC445104         | <i>T.durum</i>    | R    | S    | R | R | R | 1999 | MEXICO | <i>NA</i>                                          |
| 529 | BR | EC444817         | <i>T.durum</i>    | R    | S    | R | R | R | 1999 | MEXICO | <i>Lr22aLr46Lr50Yr5Yr15Yr48</i>                    |
| 530 | BR | EC277211         | <i>T.durum</i>    | R    | MR   | R | R | R | 1988 | MEXICO | <i>Lr19Lr22aLr32Lr46Yr5Yr15Yr36Yr48Sr2Sr13</i>     |
| 531 | BR | EC277164(170)    | <i>T.aestivum</i> | R    | S    | R | R | R | 1988 | MEXICO | <i>NA</i>                                          |
| 532 | BR | EC277109         | <i>T.aestivum</i> | MS   | MS   | R | R | R | 1988 | MEXICO | <i>Lr22aLr32Lr50Yr5Yr15Yr48Sr2</i>                 |
| 533 | BR | EC277107         | <i>T.durum</i>    | R    | S    | R | R | R | 1988 | MEXICO | <i>Lr19Lr22aLr32Lr46Yr5Yr15Yr36Yr48Sr2Sr13</i>     |
| 534 | BR | EC277072         | <i>T.durum</i>    | R    | MS   | R | R | R | 1988 | MEXICO | <i>Lr22aLr46Lr50Lr68Yr5Yr15Yr36Yr48Sr2Sr13</i>     |
| 535 | BR | EC277015         | <i>T.aestivum</i> | R    | S    | R | R | R | 1988 | MEXICO | <i>Lr22aLr46Lr50Yr15Yr48Sr2Sr13</i>                |
| 536 | BR | EC277012         | <i>T.durum</i>    | R    | S    | R | R | R | 1988 | MEXICO | <i>Lr22aLr32Lr37Lr46Lr50Yr5Yr15Yr36Yr48Sr2</i>     |
| 537 | BR | EC276988(3088)   | <i>T.aestivum</i> | R    | MS   | R | R | R | 1988 | MEXICO | <i>NA</i>                                          |
| 538 | BR | EC276889(3081)   | <i>T.aestivum</i> | MS   | S    | R | R | R | 1988 | MEXICO | <i>NA</i>                                          |
| 539 | BR | EC276857         | <i>T.aestivum</i> | R    | S    | R | R | R | 1988 | MEXICO | <i>Lr22aLr32Yr5Yr15Yr36Yr48Sr2Sr13</i>             |
| 540 | BR | EC276812         | <i>T.durum</i>    | R    | S    | R | R | R | 1988 | MEXICO | <i>Lr19Lr22aLr32Lr46Lr50Yr5Yr15Yr36Yr48Sr2Sr13</i> |
| 541 | BR | EC276769         | <i>T.aestivum</i> | R    | S    | R | R | R | 1988 | MEXICO | <i>Lr19Lr22aLr32Lr46Lr50Yr15Yr36Yr48</i>           |
| 542 | BR | EC276700         | <i>T.durum</i>    | MS   | MS   | R | R | R | 1988 | MEXICO | <i>Lr19Lr22aLr46Lr50Yr15Yr36Yr48Sr13</i>           |
| 543 | BR | EC276695         | <i>T.durum</i>    | R    | MS   | R | R | R | 1988 | MEXICO | <i>Lr22aLr32Lr37Lr46Yr5Yr15Yr36Yr48Sr2Sr13</i>     |
| 544 | BR | EC276687         | <i>T.durum</i>    | MS   | MS   | R | R | R | 1988 | MEXICO | <i>Lr19Lr22aLr32Yr5Yr15Yr36Yr48Sr2</i>             |
| 545 | BR | EC276663(2378)   | <i>T.durum</i>    | R    | MS   | R | R | R | 1988 | MEXICO | <i>NA</i>                                          |
| 546 | BR | EC272948         | <i>T.durum</i>    | MS   | MS   | R | R | R | NA   | NA     | <i>Lr22aLr32Lr46Lr50Yr48</i>                       |
| 547 | B  | IC547638         | <i>T.aestivum</i> | R    | S    | R | R | R | 2006 | INDIA  | <i>NA</i>                                          |
| 548 | B  | IC543406         | <i>T.aestivum</i> | R    | MS   | R | R | R | NA   | INDIA  | <i>NA</i>                                          |

|     |   |                 |                   |      |      |   |   |   |      |           |                                                  |
|-----|---|-----------------|-------------------|------|------|---|---|---|------|-----------|--------------------------------------------------|
| 549 | B | IC543240        | <i>T.durum</i>    | R    | S    | R | R | R | NA   | INDIA     | NA                                               |
| 550 | B | IC543156        | <i>T.durum</i>    | MS   | S    | R | R | R | NA   | INDIA     | NA                                               |
| 551 | B | IC542856        | <i>T.durum</i>    | R    | S    | R | R | R | NA   | INDIA     | NA                                               |
| 552 | B | IC542783        | <i>T.durum</i>    | MS   | MS   | R | R | R | NA   | INDIA     | NA                                               |
| 553 | B | IC542684        | <i>T.durum</i>    | MS   | S    | R | R | R | NA   | INDIA     | NA                                               |
| 554 | B | IC542682        | <i>T.durum</i>    | MS   | MS   | R | R | R | NA   | INDIA     | NA                                               |
| 555 | B | IC542643        | <i>T.durum</i>    | R    | S    | R | R | R | NA   | INDIA     | NA                                               |
| 556 | B | IC542596        | <i>T.durum</i>    | R    | MS   | R | R | R | NA   | INDIA     | NA                                               |
| 557 | B | IC542418        | <i>T.durum</i>    | MS   | S    | R | R | R | NA   | INDIA     | NA                                               |
| 558 | B | IC542125        | <i>T.durum</i>    | R    | MR   | R | R | R | NA   | INDIA     | NA                                               |
| 559 | B | IC542060        | <i>T.aestivum</i> | R    | S    | R | R | R | NA   | INDIA     | NA                                               |
| 560 | B | IC539345        | <i>T.aestivum</i> | MS   | MS   | R | R | R | 2005 | INDIA     | NA                                               |
| 561 | B | IC536031        | <i>T.durum</i>    | MS   | S    | R | R | R | NA   | INDIA     | NA                                               |
| 562 | B | IC535833        | <i>T.durum</i>    | <20S | S    | R | R | R | NA   | INDIA     | NA                                               |
| 563 | B | IC535730        | <i>T.durum</i>    | R    | S    | R | R | R | NA   | INDIA     | NA                                               |
| 564 | B | IC535185        | <i>T.aestivum</i> | R    | MS   | R | R | R | NA   | INDIA     | NA                                               |
| 565 | B | IC534494        | <i>T.aestivum</i> | R    | MS   | R | R | R | NA   | INDIA     | NA                                               |
| 566 | B | IC533949        | <i>T.aestivum</i> | R    | S    | R | R | R | NA   | INDIA     | NA                                               |
| 567 | B | IC533947        | <i>T.aestivum</i> | R    | S    | R | R | R | NA   | INDIA     | NA                                               |
| 568 | B | IC533709        | <i>T.aestivum</i> | R    | S    | R | R | R | NA   | INDIA     | NA                                               |
| 569 | B | IC533695        | <i>T.aestivum</i> | R    | S    | R | R | R | NA   | INDIA     | NA                                               |
| 570 | B | IC533683        | <i>T.aestivum</i> | R    | MS   | R | R | R | NA   | INDIA     | NA                                               |
| 571 | B | IC533681        | <i>T.aestivum</i> | R    | MS   | R | R | R | NA   | INDIA     | NA                                               |
| 572 | B | IC533679        | <i>T.aestivum</i> | R    | MS   | R | R | R | NA   | INDIA     | NA                                               |
| 573 | B | IC531274        | <i>T.aestivum</i> | R    | S    | R | R | R | 1999 | INDIA     | Lr19Lr22aLr46Yr5Yr15Yr36Yr48Sr2Sr13              |
| 574 | B | IC531136        | <i>T.aestivum</i> | R    | S    | R | R | R | NA   | INDIA     | NA                                               |
| 575 | B | IC470826-FLW-12 | <i>T.aestivum</i> | <20S | NULL | R | R | R | 2005 | INDIA     | NA                                               |
| 576 | B | IC445512        | <i>T.aestivum</i> | R    | MS   | R | R | R | 2004 | INDIA     | NA                                               |
| 577 | B | IC416330        | <i>T.durum</i>    | R    | S    | R | R | R | 2003 | INDIA     | Lr19Lr22aLr46Lr50Yr5Yr15Yr36Yr48Sr13             |
| 578 | B | IC416267        | <i>T.aestivum</i> | R    | S    | R | R | R | 2003 | INDIA     | NA                                               |
| 579 | B | IC416203        | <i>T.aestivum</i> | R    | S    | R | R | R | 2003 | INDIA     | Lr22aLr32Lr46Yr5Yr15Yr48Sr2Sr13                  |
| 580 | B | IC416133        | <i>T.aestivum</i> | R    | S    | R | R | R | 2003 | INDIA     | Lr22aLr32Lr46Lr50Yr5Yr15Yr36Yr48Sr2              |
| 581 | B | IC416093        | <i>T.aestivum</i> | R    | MS   | R | R | R | 2003 | INDIA     | Lr19Lr22aLr32Lr37Lr46Lr50Yr5Yr15Yr36Yr48         |
| 582 | B | IC416034        | <i>T.aestivum</i> | R    | MS   | R | R | R | 2003 | INDIA     | Lr19Lr22aLr32Lr37Lr46Yr5Yr15Yr48Sr2              |
| 583 | B | IC416033        | <i>T.aestivum</i> | R    | S    | R | R | R | 2003 | INDIA     | Lr19Lr22aLr37Lr46Lr50Yr5Yr15Yr36Yr48             |
| 584 | B | IC415953        | <i>T.aestivum</i> | R    | S    | R | R | R | 2003 | INDIA     | Lr22aLr46Yr15Yr36Yr48Sr2Sr13                     |
| 585 | B | IC415906        | <i>T.aestivum</i> | MS   | MS   | R | R | R | 2003 | INDIA     | Lr19Lr22aLr37Lr46Lr50Yr5Yr15Yr36Yr48Sr2Sr13      |
| 586 | B | IC415880        | <i>T.aestivum</i> | R    | S    | R | R | R | 2003 | INDIA     | Lr22aLr37Lr46Yr5Yr15Yr48Sr2Sr13                  |
| 587 | B | IC401966        | <i>T.aestivum</i> | R    | MS   | R | R | R | 2004 | INDIA     | NA                                               |
| 588 | B | IC35161         | <i>T.durum</i>    | R    | NULL | R | R | R | 1979 | INDIA     | Lr34Lr37Lr46Yr15Yr48Sr2                          |
| 589 | B | IC335729        | <i>T.aestivum</i> | R    | MS   | R | R | R | 2002 | INDIA     | Lr19Lr22aLr34Lr37Lr46Lr67Yr5Yr15Yr36Yr48Sr13Sr24 |
| 590 | B | IC296487-FLW-1  | <i>T.aestivum</i> | <20S | S    | R | R | R | 2000 | INDIA     | Lr19Lr22aLr46Lr68Yr5Yr15Yr36Yr48                 |
| 591 | B | IC278681        | <i>T.aestivum</i> | R    | S    | R | R | R | 2000 | INDIA     | NA                                               |
| 592 | B | IC240799        | <i>T.aestivum</i> | R    | S    | R | R | R | 1999 | INDIA     | Lr22aLr32Lr46Lr50Yr5Yr15Yr36Yr48Sr2Sr13          |
| 593 | B | EC609582        | <i>T.aestivum</i> | R    | S    | R | R | R | 2007 | AUSTRALIA | NA                                               |
| 594 | B | EC578080        | <i>T.aestivum</i> | R    | MS   | R | R | R | 2006 | NA        | NA                                               |
| 595 | B | EC577423        | <i>T.durum</i>    | R    | S    | R | R | R | 2006 | NA        | NA                                               |
| 596 | B | EC577415        | <i>T.durum</i>    | MS   | MS   | R | R | R | 2006 | NA        | NA                                               |
| 597 | B | EC575184        | <i>T.aestivum</i> | MS   | S    | R | R | R | 2006 | NA        | NA                                               |
| 598 | B | EC575065        | <i>T.aestivum</i> | R    | MS   | R | R | R | 2006 | NA        | NA                                               |
| 599 | B | EC575064        | <i>T.aestivum</i> | R    | MS   | R | R | R | 2006 | NA        | NA                                               |

|     |   |                |                   |      |    |   |   |   |      |        |    |
|-----|---|----------------|-------------------|------|----|---|---|---|------|--------|----|
| 600 | B | EC574902       | <i>T.aestivum</i> | R    | MS | R | R | R | 2006 | NA     | NA |
| 601 | B | EC574763       | <i>T.durum</i>    | R    | S  | R | R | R | 2006 | NA     | NA |
| 602 | B | EC574342       | <i>T.aestivum</i> | MS   | MS | R | R | R | 2006 | NA     | NA |
| 603 | B | EC574205       | <i>T.aestivum</i> | MS   | MS | R | R | R | 2006 | NA     | NA |
| 604 | B | EC573864       | <i>T.aestivum</i> | MS   | MS | R | R | R | 2006 | NA     | NA |
| 605 | B | EC573858       | <i>T.aestivum</i> | MR   | S  | R | R | R | 2006 | NA     | NA |
| 606 | B | EC573812       | <i>T.aestivum</i> | MS   | MR | R | R | R | 2006 | NA     | NA |
| 607 | B | EC534565       | <i>T.aestivum</i> | R    | S  | R | R | R | 2003 | USA    | NA |
| 608 | B | EC534513       | <i>T.aestivum</i> | R    | S  | R | R | R | 2003 | USA    | NA |
| 609 | B | EC534505       | <i>T.aestivum</i> | R    | S  | R | R | R | 2003 | USA    | NA |
| 610 | B | EC534452       | <i>T.aestivum</i> | MS   | S  | R | R | R | 2003 | USA    | NA |
| 611 | B | EC498427       | <i>T.aestivum</i> | MS   | S  | R | R | R | 2002 | MEXICO | NA |
| 612 | B | EC483029       | <i>T.aestivum</i> | R    | S  | R | R | R | 2001 | MEXICO | NA |
| 613 | B | EC445293       | <i>T.durum</i>    | R    | MS | R | R | R | 1999 | MEXICO | NA |
| 614 | B | EC445197       | <i>T.durum</i>    | R    | MR | R | R | R | 1999 | MEXICO | NA |
| 615 | B | EC380620       | <i>T.aestivum</i> | R    | MS | R | R | R | NA   | NA     | NA |
| 616 | B | EC339599       | <i>T.aestivum</i> | R    | MR | R | R | R | 1992 | USA    | NA |
| 617 | B | EC277359       | <i>T.durum</i>    | R    | S  | R | R | R | 1988 | MEXICO | NA |
| 618 | B | EC277314       | <i>T.durum</i>    | R    | S  | R | R | R | 1988 | MEXICO | NA |
| 619 | B | EC277301       | <i>T.durum</i>    | <20S | S  | R | R | R | 1988 | MEXICO | NA |
| 620 | B | EC277247       | <i>T.durum</i>    | R    | MS | R | R | R | 1988 | MEXICO | NA |
| 621 | B | EC277229       | <i>T.aestivum</i> | R    | S  | R | R | R | 1988 | MEXICO | NA |
| 622 | B | EC277182       | <i>T.durum</i>    | R    | S  | R | R | R | 1988 | MEXICO | NA |
| 623 | B | EC277155       | <i>T.aestivum</i> | R    | S  | R | R | R | 1988 | MEXICO | NA |
| 624 | B | EC277126       | <i>T.durum</i>    | R    | S  | R | R | R | 1988 | MEXICO | NA |
| 625 | B | EC277096       | <i>T.aestivum</i> | R    | MS | R | R | R | 1988 | MEXICO | NA |
| 626 | B | EC277039(3096) | <i>T.aestivum</i> | MS   | S  | R | R | R | 1988 | MEXICO | NA |
| 627 | B | EC277039(2439) | <i>T.aestivum</i> | MS   | S  | R | R | R | 1988 | MEXICO | NA |
| 628 | B | EC277013       | <i>T.durum</i>    | R    | MS | R | R | R | 1988 | MEXICO | NA |
| 629 | B | EC277009       | <i>T.durum</i>    | R    | S  | R | R | R | 1988 | MEXICO | NA |
| 630 | B | EC277002       | <i>T.aestivum</i> | R    | S  | R | R | R | 1988 | MEXICO | NA |
| 631 | B | EC276997       | <i>T.durum</i>    | MS   | MS | R | R | R | 1988 | MEXICO | NA |
| 632 | B | EC276987       | <i>T.aestivum</i> | R    | MS | R | R | R | 1988 | MEXICO | NA |
| 633 | B | EC276920       | <i>T.aestivum</i> | MS   | S  | R | R | R | 1988 | MEXICO | NA |
| 634 | B | EC276814       | <i>T.durum</i>    | MS   | MS | R | R | R | 1988 | MEXICO | NA |
| 635 | B | EC276748       | <i>T.aestivum</i> | R    | S  | R | R | R | 1988 | MEXICO | NA |
| 636 | B | EC276746       | <i>T.durum</i>    | R    | MS | R | R | R | 1988 | MEXICO | NA |
| 637 | B | EC276745       | <i>T.durum</i>    | R    | S  | R | R | R | 1988 | MEXICO | NA |
| 638 | B | EC276696       | <i>T.durum</i>    | R    | MS | R | R | R | 1988 | MEXICO | NA |
| 639 | B | EC276682       | <i>T.durum</i>    | R    | S  | R | R | R | 1988 | MEXICO | NA |

|     |    |                   |                   |    |    |         |   |         |      |       |                                           |
|-----|----|-------------------|-------------------|----|----|---------|---|---------|------|-------|-------------------------------------------|
| 640 | YB | IC296426-D-482    | <i>T.aestivum</i> | NA | NA | MISSING | R | MISSING | 2000 | INDIA | Lr19Lr22aLr46Lr50Sr13                     |
| 641 | B  | IC296427-D-873    | <i>T.aestivum</i> | NA | NA | MISSING | R | MISSING | 2000 | INDIA | Lr19Lr22aLr46Yr15Yr48                     |
| 642 | O  | IC296431-VL798    | <i>T.aestivum</i> | NA | NA | MISSING | R | MISSING | 2000 | INDIA | Lr19Lr22aLr34Lr46Lr50Yr5Yr15Yr48Sr24      |
| 643 | O  | IC296480-VL639    | <i>T.aestivum</i> | NA | NA | MISSING | R | >20S    | 2000 | INDIA | Lr19Lr22aLr46Lr68Yr36Yr48Sr13Sr24         |
| 644 | O  | IC309871-KBRL10   | <i>T.aestivum</i> | NA | NA | MISSING | R | MISSING | 2000 | INDIA | Lr22aLr34Lr37Lr46Lr50Yr15Yr36Yr48         |
| 645 | O  | IC309872-KBRL13   | <i>T.aestivum</i> | NA | NA | MISSING | R | MISSING | 2000 | INDIA | Lr19Lr22aLr32Lr46Lr50Yr15Yr36Yr48Sr2Sr13  |
| 646 | O  | IC309873-KBRL22   | <i>T.aestivum</i> | NA | NA | MISSING | R | MISSING | 2000 | INDIA | Lr19Lr22aLr32Lr37Lr46Lr50Yr15Yr36Yr48Sr13 |
| 647 | O  | IC296743-HALNA    | <i>T.aestivum</i> | NA | NA | MISSING | R | MISSING | 2000 | INDIA | Lr22aLr46Lr50Lr67Lr68Yr5Yr15Yr48Sr2       |
| 648 | O  | IC408331-KRL34    | <i>T.aestivum</i> | NA | NA | MISSING | R | >20S    | 2003 | INDIA | NA                                        |
| 649 | O  | IC443619-WC-F8-W1 | <i>T.aestivum</i> | NA | NA | >20S    | R | >20S    | 2004 | INDIA | NA                                        |

|     |    |                   |                   |    |    |         |    |         |      |       |                                            |
|-----|----|-------------------|-------------------|----|----|---------|----|---------|------|-------|--------------------------------------------|
| 650 | O  | IC443622-WC-F8-HT | <i>T.aestivum</i> | NA | NA | MISSING | R  | >20S    | 2004 | INDIA | <i>NA</i>                                  |
| 651 | BR | IC548327-FLW-20   | <i>T.aestivum</i> | NA | NA | MISSING | R  | MISSING | 2006 | INDIA | <i>NA</i>                                  |
| 652 | B  | IC546937-WH730    | <i>T.aestivum</i> | NA | NA | MISSING | R  | >20S    | 2006 | INDIA | <i>NA</i>                                  |
| 653 | R  | IC582907-AKW3717  | <i>T.aestivum</i> | NA | NA | MISSING | R  | MISSING | NA   | INDIA | <i>NA</i>                                  |
| 654 | O  | IC535008          | <i>T.aestivum</i> | NA | NA | >20S    | R  | R       | NA   | INDIA | <i>NA</i>                                  |
| 655 | O  | IC29007A-HTW6     | <i>T.aestivum</i> | NA | NA | NA      | NA | NA      | 1977 | INDIA | <i>Lr19Lr22aLr34Lr46Lr68Yr48Sr13</i>       |
| 656 | O  | IC035117-HTW11    | <i>T.durum</i>    | NA | NA | NA      | NA | NA      | 1979 | INDIA | <i>Lr22aLr32Lr46Yr5Yr15Yr36Yr48Sr2Sr13</i> |
| 657 | R  | IC296446          | <i>T.durum</i>    | NA | NA | NA      | NA | NA      | 2000 | INDIA | <i>NA</i>                                  |
| 658 | N  | IC296488-FLW-2    | <i>T.aestivum</i> | NA | NA | NA      | NA | NA      | 2000 | INDIA | <i>NA</i>                                  |
| 659 | BR | IC470828-FLW-28   | <i>T.aestivum</i> | NA | NA | NA      | NA | NA      | 2005 | INDIA | <i>NA</i>                                  |
